# Supplementary material
Source: PubMed Central journal article supplement (PMC2819323)

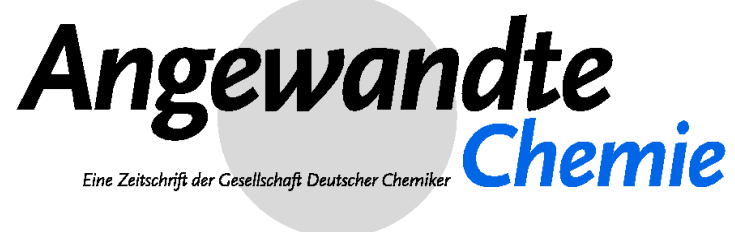

Supporting Information

© Wiley-VCH 2009

69451 Weinheim, Germany

# Iridium-Catalyzed Regio- and Enantioselective *N*-Allylation of Indoles

Levi M. Stanley and John F. Hartwig

*Department of Chemistry, University of Illinois, 600 South Mathews Avenue,  
Urbana, Illinois 61801*

## Supporting Information

### Table of Contents

|                                                                                                           |      |
|-----------------------------------------------------------------------------------------------------------|------|
| General Experimental Details                                                                              | S-1  |
| Development of Reaction Conditions for the Iridium-Catalyzed <i>N</i> -Allylation of <b>4a</b>            | S-3  |
| Table S1                                                                                                  | S-3  |
| General Procedure for <i>N</i> -Allylation of Indoles                                                     | S-4  |
| Characterization Data for <i>N</i> -Allylindoles <b>5a-z</b> and <i>N</i> -Allylazaindole <b>9</b>        | S-4  |
| Synthesis of ( <i>R</i> )-Methyl 1-(3-hydroxy-1-phenylpropyl)-1 <i>H</i> -indole-3-carboxylate <b>10</b>  | S-13 |
| Synthesis of ( <i>R</i> )-3-(1 <i>H</i> -Indol-1-yl)-3-phenylpropan-1-ol                                  | S-14 |
| Synthesis of ( <i>R</i> )-1-(3-Chloro-1-phenylpropyl)-1 <i>H</i> -indole                                  | S-14 |
| Synthesis of ( <i>R</i> )-3-(1 <i>H</i> -Indol-1-yl)- <i>N</i> -methyl-3-phenylpropan-1-amine <b>11</b>   | S-15 |
| Procedure for the Synthesis of 3-(1 <i>H</i> -Indol-1-yl)-3-arylpropan-1-amines <b>12a-12c</b>            | S-15 |
| Characterization Data for 3-(1 <i>H</i> -Indol-1-yl)-3-arylpropan-1-amines <b>12a-12c</b>                 | S-15 |
| Synthesis of Compound <b>13</b>                                                                           | S-16 |
| Synthesis of ( <i>R</i> )-3-(3-(Methoxycarbonyl)-1 <i>H</i> -indol-1-yl)-3-phenylpropanoic Acid <b>14</b> | S-17 |
| References                                                                                                | S-18 |
| <sup>1</sup> H and <sup>13</sup> C NMR Spectra for <i>N</i> -Allylindole <b>5w</b>                        | S-19 |
| <sup>1</sup> H and <sup>13</sup> C NMR Spectra for Compound <b>13</b>                                     | S-21 |
| <sup>1</sup> H and <sup>13</sup> C NMR Spectra for Indol-1-yl Propanoic Acid <b>14</b>                    | S-23 |

### General Experimental Details

All air-sensitive manipulations were conducted under an inert atmosphere in a nitrogen-filled glovebox or by standard Schlenk techniques. THF and CH<sub>2</sub>Cl<sub>2</sub> were degassed by purging with argon for 45 minutes and dried with a solvent purification system containing a one-meter column of activated alumina. Potassium phosphate and cesium carbonate were dried by heating at 110 °C in a vacuum oven for 24 h. Ethyl indole-2-carboxylate **4a**, methyl indole-3-carboxylate **4g**, indole-3-carboxaldehyde **4h**, 3-acetylindole **4i**, 3-cyanoindole **4j**, 2-phenylindole-3-carboxaldehyde **4m**, and carbazole **4p** were purchased from Sigma-Aldrich and

used without further purification. Ethyl 5-methoxyindole-2-carboxylate **4b**, ethyl 5-fluoroindole-2-carboxylate **4c**, ethyl 5-chloroindole-2-carboxylate **4d**, and 7-azaindole **7** were purchased from Alfa Aesar and used without further purification. Ethyl 5-nitroindole-2-carboxylate **4e** was purchased from Acros and used without further purification. Indole-2-carboxaldehyde **4f**,<sup>1</sup> 3-phenylindole **4k**,<sup>2</sup> 3-methylindole-2-carboxaldehyde **4l**,<sup>2</sup> and 2,3-diphenylindole **4n**<sup>3</sup> were synthesized according to published procedures. 3-Methyl-2-phenylindole **4o** was prepared according to a literature procedure from phenylhydrazine and propiophenone.<sup>3</sup>

[Ir(COD)Cl]<sub>2</sub> was synthesized from IrCl<sub>3</sub>·xH<sub>2</sub>O and 1,5-cyclooctadiene according to a literature procedure<sup>4</sup> or was obtained from Johnson-Mathey and used without further purification. Phosphoramidite ligands **L1** and **L2** were synthesized according to literature procedures.<sup>5</sup> [Ir(COD)(κ<sup>2</sup>-**L1**)(ethylene)] (**1**)<sup>6</sup> and [Ir(COD)(κ<sup>2</sup>-**L2**)(ethylene)] (**2**)<sup>7</sup> were prepared according to literature procedures.

Methyl cinnamyl carbonate was synthesized from the reaction of cinnamyl alcohol with methyl chloroformate using pyridine as the base. Allylic Boc carbonates were synthesized from reactions of the corresponding allylic alcohols with Boc<sub>2</sub>O using 30% aq. NaOH as the base and a catalytic quantity of Bu<sub>4</sub>H<sub>2</sub>SO<sub>4</sub> as a phase transfer catalyst.<sup>8</sup> Cinnamyl alcohol, *trans*, *trans*-2,4-hexadiene-1-ol, and *trans*-2-hexen-1-ol were purchased from Aldrich. (*E*)-4-Methoxycinnamyl alcohol, (*E*)-2-methoxycinnamyl alcohol, and (*E*)-3-(2-furanyl)-2-propen-1-ol were synthesized by reduction of corresponding commercially available aldehydes with NaBH<sub>4</sub>. (*E*)-3-(4-bromophenyl)prop-2-en-1-ol, (*E*)-3-(4-(trifluoromethyl)phenyl)prop-2-en-1-ol, (*E*)-3-methoxycinnamyl alcohol, (*E*)-3-cyclohexylprop-2-en-1-ol, and (*E*)-4-(benzyloxy)but-2-en-1-ol were synthesized by reduction of the corresponding α,β-unsaturated ethyl esters with DIBAL-H. The α,β-unsaturated ethyl esters were synthesized from the appropriate aldehyde and triethyl phosphonoacetate by the Roush-Masamune modification of the Horner-Wadsworth-Emmons reaction.<sup>9</sup>

Elemental analyses were performed by the University of Illinois at Urbana-Champaign Microanalysis Laboratory and by Roberston Microlit Laboratories, Inc. (Madison, NJ). HRMS (ESI) analyses were performed by the University of Illinois Mass Spectrometry Center. GC analyses were obtained on an Agilent 6890 GC equipped with an HP-5 column (25 m x 0.20 mm ID x 0.33 μm film) and an FID detector. Optical rotations were measured on a Rudolph Instruments (Denville, NJ) Autopol IV polarimeter. NMR spectra were acquired on 500 MHz Varian Unity or Inova instruments at the University of Illinois VOICE NMR facility. Chemical shifts are reported in ppm relative to a residual solvent peak (CDCl<sub>3</sub> = 7.26 ppm for <sup>1</sup>H and 77.23 ppm for <sup>13</sup>C) or to an external standard (85% H<sub>3</sub>PO<sub>4</sub> = 0 ppm for <sup>31</sup>P). Coupling constants are reported in hertz. HPLC analyses were carried out on a Waters chromatography system (1525 binary pump, 717+ autosampler, 2487 dual wavelength detector).

Flash column chromatography was performed on Silicycle Siala-P silica gel using hexanes/ethyl acetate, hexanes/acetone, hexanes/isopropanol, or chloroform/MeOH mixtures. Products were visualized on TLC by UV or by staining with KMnO<sub>4</sub> or ceric ammonium molybdate.

## Development of Reaction Conditions for the Iridium-Catalyzed *N*-Allylation of **4a**

**Table S1.** Study of reaction conditions for the *N*-allylation of **4a** with alkyl cinnamyl carbonates.

R = Me, Et, *i*Pr or *t*Bu

[Ir(COD)(κ<sup>2</sup>-L1)(ethylene)] (**1**)    L1: Ar = Ph  
 [Ir(COD)(κ<sup>2</sup>-L2)(ethylene)] (**2**)    L2: Ar = 2-MeO-C<sub>6</sub>H<sub>4</sub>

| Entry | Catalyst (mol%) | R           | Base (mol %)                          | Conversion [%] | <b>5a:6a</b> | Yield <b>5a</b> [%] | Ee [%] |
|-------|-----------------|-------------|---------------------------------------|----------------|--------------|---------------------|--------|
| 1     | <b>1</b> (4)    | Me          | K <sub>3</sub> PO <sub>4</sub> (100)  | 69             | 98:2         | 48                  | 96     |
| 2     | <b>1</b> (2)    | Me          | K <sub>3</sub> PO <sub>4</sub> (100)  | 64             | 94:6         | 52                  | 96     |
| 3     | <b>1</b> (2)    | Me          | Cs <sub>2</sub> CO <sub>3</sub> (100) | 96             | 97:3         | 86                  | 97     |
| 4     | <b>2</b> (2)    | Me          | Cs <sub>2</sub> CO <sub>3</sub> (100) | 99             | 98:2         | 90                  | 99     |
| 5     | <b>2</b> (1)    | Me          | Cs <sub>2</sub> CO <sub>3</sub> (100) | 81             | 98:2         | 77                  | 99     |
| 6     | <b>2</b> (0.5)  | Me          | Cs <sub>2</sub> CO <sub>3</sub> (100) | 68             | 98:2         | 62                  | 99     |
| 7     | <b>2</b> (2)    | Me          | Cs <sub>2</sub> CO <sub>3</sub> (50)  | 99             | 98:2         | 89                  | 99     |
| 8     | <b>2</b> (2)    | Me          | Cs <sub>2</sub> CO <sub>3</sub> (20)  | 99             | 97:3         | 83                  | 99     |
| 9     | <b>2</b> (2)    | Me          | Cs <sub>2</sub> CO <sub>3</sub> (10)  | 99             | 97:3         | 87                  | 99     |
| 10    | <b>2</b> (2)    | Me          | --                                    | 96             | 98:2         | 78                  | 99     |
| 11    | <b>2</b> (2)    | Et          | Cs <sub>2</sub> CO <sub>3</sub> (10)  | 99             | 97:3         | 82                  | 99     |
| 12    | <b>2</b> (2)    | <i>i</i> Pr | Cs <sub>2</sub> CO <sub>3</sub> (10)  | 99             | 96:4         | 85                  | 99     |
| 13    | <b>2</b> (2)    | <i>t</i> Bu | Cs <sub>2</sub> CO <sub>3</sub> (10)  | 99             | 97:3         | 89                  | 99     |

In a nitrogen-filled dry-box, the catalyst precursor **1** or **2** (0.5-4 mol %), base (0-100 mol %), ethyl indole-2-carboxylate **4a** (0.104 g, 0.550 mmol), and THF (1 mL) were added to a 1-dram vial. Then, the alkyl cinnamyl carbonate (0.500 mmol) and dodecane (20 μL) were added. The vial was sealed with a PTFE/silicone-lined septum cap, removed from the dry-box, and heated at 50 °C in an oil bath. Reaction progress was monitored by GC. When the reaction to be complete, the vial was removed from the oil bath, cooled to room temperature, then filtered through a 0.5 inch plug of silica gel (eluting with EtOAc). The crude reaction mixture was concentrated under reduced pressure. CDCl<sub>3</sub> (0.7-0.8 mL) was added to dissolve the crude reaction mixture, and mesitylene (23 μL) was added as an internal standard. The branched-to-linear ratio was then determined by <sup>1</sup>H NMR spectroscopy. After this analysis, the crude reaction mixture was purified by flash column chromatography (97:3 hexanes:EtOAc) to yield **5a**. The enantiomeric excess was determined by HPLC analysis (254 nm, 25 °C) *t*<sub>R</sub> 4.8 min (*S*); *t*<sub>R</sub> 6.0 min (*R*) [Chiracel AD-H (0.46 cm x 25 cm)(from Daicel Chemical Ind., Ltd.) hexane/*i*-PrOH, 95:5, 1.0 mL/min].

## General Procedure for *N*-Allylation of Indoles

In a nitrogen-filled dry-box, the catalyst precursor **2** (0.010 mmol, 0.020 equiv), Cs<sub>2</sub>CO<sub>3</sub> (0.050 mmol, 0.100 equiv), indole nucleophile **4** or azaindole **7** (0.550 mmol, 1.10 equiv), and THF (1 mL) were added to a 1-dram vial. Then, the allylic carbonate **3** (0.500 mmol, 1.00 equiv) and dodecane (20 μL) were added. The vial was sealed with a PTFE/silicone-lined septum cap, removed from the dry-box, and heated at 50 °C in an oil bath. Reaction progress was monitored by GC. When the reaction was judged to be complete, the vial was removed from the oil bath, cooled to room temperature, then filtered through a 0.5 inch plug of silica gel (eluting with EtOAc) to remove solid Cs<sub>2</sub>CO<sub>3</sub>. The crude reaction mixture was concentrated under reduced pressure. CDCl<sub>3</sub> (0.7-0.8 mL) was added to dissolve the crude reaction mixture, and mesitylene (23 μL) was added as an internal standard. The branched-to-linear ratio was then determined by <sup>1</sup>H NMR spectroscopy. After this analysis, the crude reaction mixture was purified by flash column silica gel chromatography (eluting with hexanes:EtOAc, hexanes:acetone, or chloroform:MeOH mixtures) to yield product **5** or **8**.

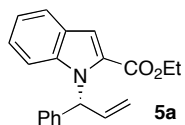

**(R)-Ethyl 1-(1-phenylallyl)-1H-indole-2-carboxylate (5a)**: Prepared according to the general procedure from **3a** (0.0961 g, 0.500 mmol) and **4a** (0.104 g, 0.550 mmol) (reaction time = 6 h). <sup>1</sup>H NMR spectroscopy showed a 97:3 branched:linear ratio. The mixture was purified by flash column chromatography (97:3 hexanes:EtOAc) to give **5a** as a white amorphous solid in 89% yield (0.136 g, 0.445 mmol). The enantiomeric excess was determined by HPLC analysis (254 nm, 25 °C) t<sub>R</sub> 4.8 min (minor); t<sub>R</sub> 6.0 min (major) [Chiracel AD-H (0.46 cm x 25 cm)(from Daicel Chemical Ind., Ltd.) hexane/*i*-PrOH, 95:5, 1.0 mL/min] to be 99%. [α]<sub>D</sub><sup>25</sup> = +45.5° (c 1.27, CHCl<sub>3</sub>). <sup>1</sup>H NMR (CDCl<sub>3</sub>, 500 MHz) δ 1.44 (t, *J* = 7.0 Hz, 3H), 4.40 (q, *J* = 7.0 Hz, 2H), 5.27 (d, *J* = 17.5 Hz, 1H), 5.43 (d, *J* = 10.5 Hz, 1H), 6.64 (ddd, *J* = 17.5, 10.5, 6.5 Hz, 1H), 7.09-7.14 (m, 3H), 7.25-7.35 (m, 5H), 7.47 (s, 1H), 7.62 (d, *J* = 6.5 Hz, 1H), 7.70-7.72 (m, 1H). <sup>13</sup>C NMR (CDCl<sub>3</sub>, 125 MHz) δ 14.5, 60.7, 60.9, 112.0, 114.1, 119.4, 120.7, 122.8, 124.7, 126.9, 127.0, 127.4, 128.1, 128.7, 135.2, 138.5, 139.8, 162.5. Anal. Calcd. for C<sub>20</sub>H<sub>19</sub>NO<sub>2</sub>: C, 78.66; H, 6.27, N, 4.59; found: C, 78.74; H, 6.45; N, 4.56.

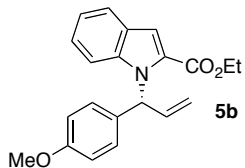

**(R)-Ethyl 1-(1-(4-methoxyphenyl)allyl)-1H-indole-2-carboxylate (5b)**: Prepared according to the general procedure from **3b** (0.111 g, 0.500 mmol) and **4a** (0.104 g, 0.550 mmol) (reaction time = 6 h). <sup>1</sup>H NMR spectroscopy showed a 99:1 branched:linear ratio. The mixture was purified by flash column chromatography (95:5 hexanes:EtOAc) to give **5b** as a colorless oil in 88% yield (0.147 g, 0.438 mmol). The enantiomeric excess was determined by HPLC analysis (254 nm, 25 °C) t<sub>R</sub> 7.8 min (minor); t<sub>R</sub> 11.6 min (major) [Chiracel AD-H (0.46 cm x 25 cm)(from Daicel Chemical Ind., Ltd.) hexane/*i*-PrOH, 95:5, 1.0 mL/min] to be 99%. [α]<sub>D</sub><sup>25</sup> = +40.2° (c 1.23, CHCl<sub>3</sub>). <sup>1</sup>H NMR (CDCl<sub>3</sub>, 500 MHz) δ 1.43 (t, *J* = 7.0 Hz, 3H), 3.79 (s, 3H), 4.40 (q, 7.0 Hz, 2H), 5.22 (d, *J* = 17.0 Hz, 1H), 5.40 (d, *J* = 10.5 Hz, 1H), 6.01 (ddd, *J* = 17.0, 10.5, 6.5 Hz, 1H), 6.85 (d, *J* = 8.5 Hz, 2H), 7.08-7.14 (m, 3H), 7.19 (d, *J* = 8.5 Hz, 2H), 7.45 (s, 1H), 7.54 (d, *J* = 6.5 Hz, 1H), 7.67-7.71 (m, 1H). <sup>13</sup>C NMR (CDCl<sub>3</sub>, 125 MHz) δ 14.6, 55.5, 60.4, 60.9, 112.0, 114.1, 114.3, 119.1, 120.8, 122.9, 124.7, 127.0, 128.2, 128.3, 132.0, 135.6, 138.6, 158.9, 162.6. Anal. Calcd. for C<sub>21</sub>H<sub>21</sub>NO<sub>3</sub>: C, 75.20; H, 6.31, N, 4.18; found: C, 75.44; H, 6.54; N, 3.99.

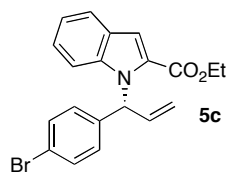

**(R)-Ethyl 1-(1-(4-bromophenyl)allyl)-1H-indole-2-carboxylate (5c):**

Prepared according to the general procedure from **3c** (0.160 g, 0.500 mmol) and **4a** (0.104 g, 0.550 mmol) (reaction time = 5 h). <sup>1</sup>H NMR spectroscopy showed a 97:3 branched:linear ratio. The mixture was purified by flash column chromatography (98:2 hexanes:EtOAc) to give **5c** as a colorless oil in 87% yield (0.168 g, 0.437 mmol). The enantiomeric excess was determined by HPLC analysis (254 nm, 25 °C) *t<sub>R</sub>* 5.2 min (minor); *t<sub>R</sub>* 8.0 min (major) [Chiracel AD-H (0.46 cm x 25 cm)(from Daicel Chemical Ind., Ltd.) hexane/*i*-PrOH, 95:5, 1.0 mL/min] to be 99%. [ $\alpha$ ]<sub>D</sub><sup>25</sup> = +14.8° (c 1.42, CHCl<sub>3</sub>). <sup>1</sup>H NMR (CDCl<sub>3</sub>, 500 MHz)  $\delta$  1.43 (t, *J* = 7.0 Hz, 3H), 4.39 (q, *J* = 7.0 Hz, 2H), 5.27 (d, *J* = 17.0 Hz, 1H), 5.43 (d, *J* = 10.5 Hz, 1H), 6.57 (ddd, *J* = 17.0, 10.5, 7.0 Hz, 1H), 7.06-7.17 (m, 5H), 7.44 (d, *J* = 8.5 Hz, 2H), 7.46 (s, 1H), 7.53 (d, *J* = 7.0 Hz, 1H), 7.70 (d, *J* = 7.5 Hz, 1H). <sup>13</sup>C NMR (CDCl<sub>3</sub>, 125 MHz)  $\delta$  14.5, 60.3, 60.9, 112.2, 113.8, 119.9, 120.9, 121.4, 123.0, 124.9, 126.9, 127.9, 128.7, 131.8, 134.7, 138.3, 138.9, 162.5. Anal. Calcd. for C<sub>20</sub>H<sub>18</sub>NO<sub>2</sub>Br: C, 62.51; H, 4.72, N, 3.65; found: C, 62.78; H, 4.87; N, 3.61.

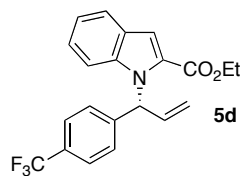

**(R)-Ethyl 1-(1-(4-(trifluoromethyl)phenyl)allyl)-1H-indole-2-carboxylate (5d):**

Prepared according to a modified version of the general procedure from **3d** (0.151 g, 0.500 mmol) and **4a** (0.104 g, 0.550 mmol) using 4 mol % **2** (0.0185 g, 0.0200 mmol) as the catalyst precursor (reaction time = 24 h). <sup>1</sup>H NMR spectroscopy showed a 91:9 branched:linear ratio. The mixture was purified by flash column chromatography (96:4 hexanes:EtOAc) to give **5d** as a colorless oil in 85% yield (0.159 g, 0.426 mmol). The enantiomeric excess was determined by HPLC analysis (254 nm, 25 °C) *t<sub>R</sub>* 4.4 min (major); *t<sub>R</sub>* 7.0 min (minor) [Chiracel AD-H (0.46 cm x 25 cm)(from Daicel Chemical Ind., Ltd.) hexane/*i*-PrOH, 95:5, 1.0 mL/min] to be 99%. [ $\alpha$ ]<sub>D</sub><sup>25</sup> = +7.1° (c 1.21, CHCl<sub>3</sub>). <sup>1</sup>H NMR (CDCl<sub>3</sub>, 500 MHz)  $\delta$  1.42 (t, *J* = 7.0 Hz, 3H), 3.39 (q, *J* = 7.0 Hz, 2H), 5.32 (d, *J* = 17.0 Hz, 1H), 5.47 (d, *J* = 10.5 Hz, 1H), 6.60 (ddd, *J* = 17.0, 10.5, 6.5 Hz, 1H), 7.06 (d, *J* = 8.0 Hz, 1H), 7.12-7.18 (m, 2 H), 7.34 (d, *J* = 8.5 Hz, 2H), 7.48 (s, 1H), 7.58 (d, *J* = 8.5 Hz, 2H), 7.63 (d, *J* = 6.5 Hz, 1H), 7.72 (d, *J* = 8.0 Hz, 1H). <sup>13</sup>C NMR (CDCl<sub>3</sub>, 125 MHz)  $\delta$  14.5, 60.5, 61.0, 112.3, 113.7, 120.3, 121.0, 123.1, 124.3 (q, *J* = 271 Hz), 125.1, 125.7 (q, *J<sub>CF</sub>* = 3.6 Hz), 127.0, 127.3, 127.9, 129.7 (q, *J<sub>CF</sub>* = 33 Hz), 134.5, 138.4, 144.0, 152.5. Anal. Calcd. for C<sub>21</sub>H<sub>18</sub>NO<sub>2</sub>F<sub>3</sub>: C, 67.55; H, 4.86, N, 3.75; found: C, 67.70; H, 5.00; N, 3.76.

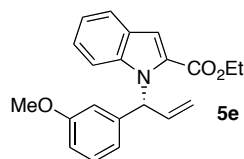

**(R)-Ethyl 1-(1-(3-methoxyphenyl)allyl)-1H-indole-2-carboxylate (5e):**

Prepared according to the general procedure from **3e** (0.132 g, 0.500 mmol) and **4a** (0.104 g, 0.550 mmol) (reaction time = 8 h). <sup>1</sup>H NMR spectroscopy showed a 98:2 branched:linear ratio. The mixture was purified by flash column chromatography (95:5 hexanes:EtOAc) to give **5e** as a colorless oil in 95% yield (0.159 g, 0.474 mmol). The enantiomeric excess was determined by HPLC analysis (254 nm, 25 °C) *t<sub>R</sub>* 7.6 min (minor); *t<sub>R</sub>* 8.9 min (major) [Chiracel AD-H (0.46 cm x 25 cm)(from Daicel Chemical Ind., Ltd.) hexane/*i*-PrOH, 98:2, 1.0 mL/min] to be 99%. [ $\alpha$ ]<sub>D</sub><sup>26</sup> = +48.1° (c 1.36, CHCl<sub>3</sub>). <sup>1</sup>H NMR (CDCl<sub>3</sub>, 500 MHz)  $\delta$  1.43 (t, *J* = 7.0 Hz, 3H), 3.74 (s, 3H), 4.40 (q, *J* = 7.0 Hz, 2H), 5.27 (d, *J* = 17.0 Hz, 1H), 5.41 (d, *J* = 10.5 Hz, 1H), 6.61 (ddd, *J* = 17.0, 10.5, 7.0 Hz, 1H), 6.80-6.84 (m, 3H), 7.09-7.14 (m, 3H), 7.24 (t, *J* = 8.0 Hz, 1H), 7.46 (s, 1H), 7.58 (d, *J* = 7.0 Hz, 1H), 7.68-7.71 (m, 1H). <sup>13</sup>C NMR (CDCl<sub>3</sub>, 125 MHz)  $\delta$  14.8, 55.3, 60.6, 60.8, 112.0, 112.3, 113.1, 114.1, 119.3, 119.4, 120.7, 122.8, 124.7, 126.8, 128.0, 129.7,

135.0, 138.5, 141.5, 159.9, 162.5. Anal. Calcd. for C<sub>21</sub>H<sub>21</sub>NO<sub>3</sub>: C, 75.20; H, 6.31, N, 4.18; found: C, 75.24; H, 6.49; N, 3.94.

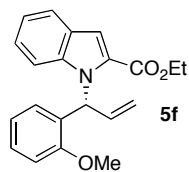

**(R)-Ethyl 1-(1-(2-methoxyphenyl)allyl)-1H-indole-2-carboxylate (5f):**

Prepared according to a modified version of the general procedure (reaction temperature = room temperature) from **3f** (0.132 g, 0.500 mmol) and **4a** (0.104 g, 0.550 mmol) (reaction time = 20 h). <sup>1</sup>H NMR spectroscopy showed a 95:5 branched:linear ratio. The mixture was purified by flash column chromatography (95:5 hexanes:EtOAc) to give **5f** as a colorless oil in 72% yield (0.121 g, 0.361 mmol). The enantiomeric excess was determined by HPLC analysis (254 nm, 25 °C) t<sub>R</sub> 6.2 min (major); t<sub>R</sub> 8.0 min (minor) [Chiracel AD-H (0.46 cm x 25 cm)(from Daicel Chemical Ind., Ltd.) hexane/*i*-PrOH, 98:2, 1.0 mL/min] to be 96%. [α]<sub>D</sub><sup>26</sup> = +132.3° (c 0.60, CHCl<sub>3</sub>). <sup>1</sup>H NMR (CDCl<sub>3</sub>, 500 MHz) δ 1.44 (t, *J* = 7.0 Hz, 3H), 3.62 (s, 3H), 4.42 (q, *J* = 7.0 Hz, 2H), 5.08 (dd, *J* = 17.0, 1.0 Hz, 1H), 5.42 (dd, *J* = 10.5, 1.0 Hz, 1H), 6.58 (ddd, *J* = 17.0, 10.5, 4.5 Hz, 1H), 6.78 (d, *J* = 8.5 Hz, 1H), 6.96 (t, *J* = 7.5 Hz, 1H), 7.07 (t, *J* = 7.5 Hz, 1H), 7.12 (t, *J* = 7.0 Hz, 1H), 7.24 (t, *J* = 8.0 Hz, 1H), 7.36 (d, *J* = 7.5, 1H), 7.37 (s, 1H), 7.45 (d, *J* = 7.5 Hz, 1H), 7.66 (d, *J* = 7.5 Hz, 1H), 7.71-7.72 (m, 1H). <sup>13</sup>C NMR (CDCl<sub>3</sub>, 125 MHz) δ 14.6, 55.5, 56.6, 60.7, 110.7, 111.1, 114.1, 117.4, 120.1, 120.2, 122.5, 124.1, 126.7, 127.7, 128.9, 129.1, 129.3, 135.4, 138.9, 157.9, 162.5. Anal. Calcd. for C<sub>21</sub>H<sub>21</sub>NO<sub>3</sub>: C, 75.20; H, 6.31, N, 4.18; found: C, 74.92; H, 6.59; N, 4.03.

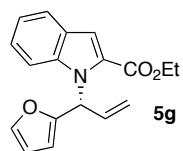

**(R)-Ethyl 1-(1-(furan-2-yl)allyl)-1H-indole-2-carboxylate (5g):**

Prepared according to a modified version of the general procedure (reaction temperature = room temperature) from **3g** (0.112 g, 0.500 mmol) and **4a** (0.104 g, 0.550 mmol) (reaction time = 6 h). <sup>1</sup>H NMR spectroscopy showed a 91:9 branched:linear ratio. The mixture was purified by flash column chromatography (98:2 hexanes:EtOAc) to give **5g** as a colorless oil in 85% yield (0.125 g, 0.423 mmol). The enantiomeric excess was determined by HPLC analysis (254 nm, 25 °C) t<sub>R</sub> 7.1 min (minor); t<sub>R</sub> 11.5 min (major) [Chiracel OD-H (0.46 cm x 25 cm)(from Daicel Chemical Ind., Ltd.) hexane/*i*-PrOH, 98:2, 1.0 mL/min] to be 99%. [α]<sub>D</sub><sup>24</sup> = +24.7° (c 0.70, CHCl<sub>3</sub>). <sup>1</sup>H NMR (CDCl<sub>3</sub>, 500 MHz) δ 1.45 (t, *J* = 7.0 Hz, 3H), 4.43 (q, *J* = 7.0 Hz, 2H), 5.13 (ddd, *J* = 17.0, 2.0, 1.0 Hz, 1H), 5.39 (ddd, *J* = 10.5, 2.0, 1.0 Hz, 1H), 6.37 (app d, *J* = 1.0 Hz, 2H), 6.50 (ddd, *J* = 17.0, 10.5, 5.5 Hz, 1H), 7.14 (ddd, *J* = 8.0, 8.0, 1.0 Hz, 1H), 7.21 (ddd, *J* = 8.5, 8.0, 1.0 Hz, 1H), 7.33 (dd, *J* = 8.5, 1.0 Hz, 1H), 7.34 (dd, *J* = 1.0, 1.0 Hz, 1H), 7.45 (d, *J* = 1.0, 1H), 7.70 (ddd, *J* = 8.0, 1.0, 1.0 Hz, 1H), 7.72 (ddd, *J* = 5.5, 2.0, 1.0 Hz, 1H). <sup>13</sup>C NMR (CDCl<sub>3</sub>, 125 MHz) δ 14.5, 55.1, 60.9, 108.3, 110.4, 112.0, 113.7, 118.4, 120.8, 122.8, 124.9, 126.7, 127.6, 133.4, 138.7, 142.6, 152.4, 162.5. Anal. Calcd. for C<sub>18</sub>H<sub>17</sub>NO<sub>3</sub>: C, 73.20; H, 5.80, N, 4.74; found: C, 73.18; H, 5.93; N, 4.66.

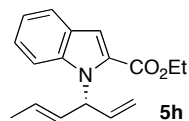

**(R,E)-Ethyl 1-(hexa-1,4-dien-3-yl)-1H-indole-2-carboxylate (5h):**

Prepared according to a modified version of the general procedure (reaction temperature = room temperature) from **3h** (0.0991 g, 0.500 mmol) and **4a** (0.104 g, 0.550 mmol) (reaction time = 23 h). <sup>1</sup>H NMR spectroscopy showed a 99:1 branched:linear ratio. The mixture was purified by flash column chromatography (98:2 hexanes:EtOAc) to give **5h** as a colorless oil in 86% yield (0.116 g, 0.429 mmol). The enantiomeric excess after reduction of the ester with lithium aluminum hydride was determined by HPLC analysis (254 nm, 25 °C) t<sub>R</sub> 12.2 min (major); t<sub>R</sub> 13.9 min (minor) [Chiracel AD-H

(0.46 cm x 25 cm)(from Daicel Chemical Ind., Ltd.) hexane/*i*-PrOH, 95:5, 1.0 mL/min] to be 99%.  $[\alpha]_D^{25} = -18.6^\circ$  (c 1.08, CHCl<sub>3</sub>). <sup>1</sup>H NMR (CDCl<sub>3</sub>, 500 MHz)  $\delta$  1.43 (t,  $J = 7.0$  Hz, 3H), 1.74 (d,  $J = 6.5$  Hz, 3H), 4.39 (q,  $J = 7.0$  Hz, 2H), 5.20 (d,  $J = 17.0$  Hz, 1H), 5.28 (d,  $J = 10.5$  Hz, 1H), 5.69-5.76 (dq,  $J = 15.5, 6.5$  Hz, 1H), 5.97 (ddd,  $J = 15.5, 6.0, 1.5$  Hz, 1H), 6.28 (ddd,  $J = 17.0, 10.5, 4.5$  Hz, 1H), 6.91 (br s, 1H), 7.15 (t,  $J = 8.0$  Hz, 1H), 7.27 (t,  $J = 8.0$  Hz, 1H), 7.37 (s, 1H), 7.55 (d,  $J = 8.0$  Hz, 1H), 7.69 (d,  $J = 8.0$  Hz, 1H). <sup>13</sup>C NMR (CDCl<sub>3</sub>, 125 MHz)  $\delta$  15.5, 18.0, 58.9, 60.8, 111.5, 114.1, 116.7, 120.6, 122.8, 124.5, 126.7, 127.4, 128.7, 129.2, 137.3, 138.5, 162.5. Anal. Calcd. for C<sub>17</sub>H<sub>19</sub>NO<sub>2</sub>: C, 75.81; H, 7.11, N, 5.20; found: C, 75.83; H, 7.25; N, 5.15.

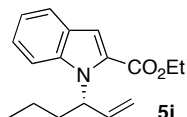

**(S)-Ethyl 1-(hex-1-en-3-yl)-1H-indole-2-carboxylate (5i):** Prepared according to a modified version of the general procedure (reaction temperature = room temperature) from **3i** (0.100 g, 0.500 mmol) and **4a** (0.104 g, 0.550 mmol) (reaction time = 4 h). <sup>1</sup>H NMR spectroscopy showed a 94:6 branched:linear

ratio. The mixture was purified by flash column chromatography (97:3 hexanes:EtOAc) to give **5i** as a colorless oil in 92% yield (0.125 g, 0.460 mmol). The enantiomeric excess was determined by HPLC analysis (254 nm, 25 °C)  $t_R$  4.4 min (major);  $t_R$  6.1 min (minor) [Chiracel OD-H (0.46 cm x 25 cm)(from Daicel Chemical Ind., Ltd.) hexane/*i*-PrOH, 98:2, 1.0 mL/min] to be 99%.  $[\alpha]_D^{25} = +61.5^\circ$  (c 1.05, CHCl<sub>3</sub>). <sup>1</sup>H NMR (CDCl<sub>3</sub>, 500 MHz)  $\delta$  0.87 (t,  $J = 7.0$  Hz, 3H), 0.93-1.02 (m, 1H), 1.23-1.30 (m, 1H), 1.43 (t,  $J = 7.0$  Hz, 3H), 1.96-2.06 (m, 1H), 2.21-2.29 (m, 1H), 4.39 (q,  $J = 7.0$  Hz, 2H), 5.16 (dd,  $J = 16.5, 1.5$  Hz, 1H), 5.24 (dd,  $J = 10.0, 1.5$  Hz, 1H), 6.25-6.32 (m, 2H), 7.15 (t,  $J = 8.0$  Hz, 1H), 7.27 (t,  $J = 8.5$  Hz, 1H), 7.37 (s, 1H), 7.55 (d,  $J = 8.5$  Hz, 1H), 7.70 (d,  $J = 8.0$  Hz, 1H). <sup>13</sup>C NMR (CDCl<sub>3</sub>, 125 MHz)  $\delta$  14.0, 14.5, 19.7, 35.0, 57.5, 60.8, 111.3, 113.9, 115.9, 120.5, 122.9, 124.4, 126.7, 128.4, 138.0, 138.2, 162.6. Anal. Calcd. for C<sub>17</sub>H<sub>21</sub>NO<sub>2</sub>: C, 75.25; H, 7.80, N, 5.16; found: C, 75.33; H, 7.81; N, 5.12.

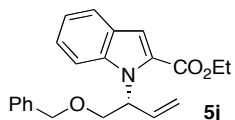

**(R)-Ethyl 1-(1-(benzyloxy)but-3-en-2-yl)-1H-indole-2-carboxylate (5j):** Prepared according to a modified version of the general procedure (reaction temperature = room temperature) from **3j** (0.139 g, 0.500 mmol) and **4a** (0.104 g, 0.550 mmol) (reaction time = 6 h). <sup>1</sup>H NMR spectroscopy showed

a 77:23 branched:linear ratio. The mixture was purified by flash column chromatography (95:5 hexanes:EtOAc) to give **5j** as a colorless oil in 70% yield (0.122 g, 0.349 mmol). The enantiomeric excess was determined by HPLC analysis (254 nm, 25 °C)  $t_R$  10.0 min (minor);  $t_R$  16.5 min (major) [Chiracel OD-H (0.46 cm x 25 cm)(from Daicel Chemical Ind., Ltd.) hexane/*i*-PrOH, 98:2, 1.0 mL/min] to be 98%.  $[\alpha]_D^{25} = +25.8^\circ$  (c 0.86, CHCl<sub>3</sub>). <sup>1</sup>H NMR (CDCl<sub>3</sub>, 500 MHz)  $\delta$  1.43 (t,  $J = 7.0$  Hz, 3H), 4.06-4.12 (m, 2H), 4.39 (q,  $J = 7.0$  Hz, 2H), 4.41 (d,  $J = 12.5$  Hz, 1H), 4.48 (d,  $J = 12.5$  Hz, 1H), 5.21 (ddd,  $J = 17.5, 1.0, 1.0$  Hz, 1H), 5.33 (ddd,  $J = 11.0, 1.0, 1.0$  Hz, 1H), 6.32 (ddd,  $J = 17.5, 11.0, 4.5$  Hz, 1H), 6.58 (br s, 1H), 7.12-7.28 (m, 7H), 7.42 (s, 1H), 7.51 (d,  $J = 8.5$  Hz, 1H), 7.72 (d,  $J = 8.0$  Hz, 1H). <sup>13</sup>C NMR (CDCl<sub>3</sub>, 125 MHz)  $\delta$  14.5, 57.2, 60.8, 70.6, 72.9, 111.7, 113.7, 117.4, 120.7, 122.9, 124.5, 126.9, 127.5, 127.6, 128.4, 128.6, 134.7, 138.2, 138.6, 162.5. Anal. Calcd. for C<sub>22</sub>H<sub>23</sub>NO<sub>3</sub>: C, 75.62; H, 6.63, N, 4.01; found: C, 75.47; H, 6.57; N, 3.87.



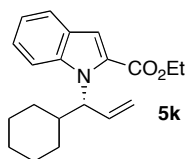

**(R)-Ethyl 1-(1-cyclohexylallyl)-1H-indole-2-carboxylate (5k):** Prepared according to a modified version of the general procedure from **3k** (0.120 g, 0.500 mmol) and **4a** (0.104 g, 0.550 mmol) using 4 mol % **2** (0.0185 g, 0.0200 mmol) as the catalyst precursor (reaction time = 6 h).  $^1\text{H}$  NMR spectroscopy showed a 87:13 branched:linear ratio. The mixture was purified by flash column chromatography (98:2 hexanes:EtOAc) to give **5k** as a colorless oil in 54% yield (0.0841 g, 0.270 mmol). The enantiomeric excess was determined by HPLC analysis (254 nm, 25 °C)  $t_{\text{R}}$  3.8 min (major);  $t_{\text{R}}$  5.0 min (minor) [Chiracel OD-H (0.46 cm x 25 cm)(from Daicel Chemical Ind., Ltd.) hexane/*i*-PrOH, 95:5, 1.0 mL/min] to be 99%.  $[\alpha]_{\text{D}}^{25} = +92.6^\circ$  (c 0.48,  $\text{CHCl}_3$ ).  $^1\text{H}$  NMR ( $\text{CDCl}_3$ , 500 MHz)  $\delta$  0.84-1.33 (series of m, 6H), 1.43 (t,  $J = 7.5$  Hz, 3H), 1.44-2.31 (series of m, 5H), 4.34-4.40 (m, 2H), 5.14 (d,  $J = 17.0$  Hz, 1H), 5.22 (d,  $J = 10.5$  Hz, 1H), 5.83 (br s, 1H), 6.44 (ddd,  $J = 17.0, 10.5, 7.0$  Hz, 1H), 7.13 (dd,  $J = 8.5, 8.0$  Hz, 1H), 7.27 (dd,  $J = 8.0, 8.0$  Hz, 1H), 7.34 (s, 1H), 7.53 (d,  $J = 8.5$  Hz, 1H), 7.68 (d,  $J = 8.0$  Hz, 1H).  $^{13}\text{C}$  NMR ( $\text{CDCl}_3$ , 125 MHz)  $\delta$  14.6, 26.0, 26.2, 26.5, 29.6, 31.5, 40.0, 60.8, 64.0, 111.4, 113.8, 118.5, 120.5, 123.0, 123.2, 124.5, 126.7, 128.5, 135.6, 139.3, 162.7. Anal. Calcd. for  $\text{C}_{20}\text{H}_{25}\text{NO}_2$ : C, 77.14; H, 8.09, N, 4.50; found: C, 76.86; H, 8.24; N, 4.34.

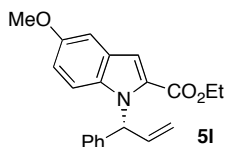

**(R)-Ethyl 5-methoxy-1-(1-phenylallyl)-1H-indole-2-carboxylate (5l):** Prepared according to the general procedure from **3a** (0.117 g, 0.500 mmol) and **4b** (0.121 g, 0.550 mmol) (reaction time = 6 h).  $^1\text{H}$  NMR spectroscopy showed a 97:3 branched:linear ratio. The mixture was purified by flash column chromatography (96:4 hexanes:EtOAc) to give **5l** as a white

amorphous solid in 88% yield (0.147 g, 0.438 mmol). The enantiomeric excess was determined by HPLC analysis (254 nm, 25 °C)  $t_{\text{R}}$  7.2 min (minor);  $t_{\text{R}}$  9.2 min (major) [Chiracel AD-H (0.46 cm x 25 cm)(from Daicel Chemical Ind., Ltd.) hexane/*i*-PrOH, 95:5, 1.0 mL/min] to be 99%.  $[\alpha]_{\text{D}}^{25} = +52.1^\circ$  (c 1.12,  $\text{CHCl}_3$ ).  $^1\text{H}$  NMR ( $\text{CDCl}_3$ , 500 MHz)  $\delta$  1.43 (t,  $J = 7.0$  Hz, 3H), 3.83 (s, 3H), 4.39 (q, 7.0 Hz, 2H), 5.25 (d,  $J = 17.5$  Hz, 1H), 5.42 (d,  $J = 10.0$  Hz, 1H), 6.60 (ddd,  $J = 17.5, 10.0, 7.0$  Hz, 1H), 6.81 (dd,  $J = 9.5, 2.5$  Hz, 1H), 6.99 (d,  $J = 9.5$  Hz, 1H), 7.09 (d,  $J = 2.5$  Hz, 1H), 7.23-7.34 (m, 5H), 7.38 (s, 1H), 7.60 (d,  $J = 7.0$  Hz, 1H).  $^{13}\text{C}$  NMR ( $\text{CDCl}_3$ , 125 MHz)  $\delta$  14.5, 55.7, 60.6, 60.8, 102.6, 111.3, 115.0, 116.2, 119.2, 127.0, 127.2, 127.4, 128.3, 128.6, 133.9, 135.3, 139.9, 154.6, 162.4. Anal. Calcd. for  $\text{C}_{21}\text{H}_{21}\text{NO}_3$ : C, 75.20; H, 6.31, N, 4.18; found: C, 75.24; H, 6.58; N, 4.09.

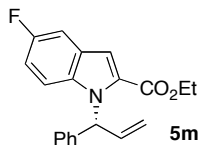

**(R)-Ethyl 5-fluoro-1-(1-phenylallyl)-1H-indole-2-carboxylate (5m):** Prepared according to the general procedure from **3a** (0.117 g, 0.500 mmol) and **4c** (0.114 g, 0.550 mmol) (reaction time = 6 h).  $^1\text{H}$  NMR spectroscopy showed a 94:6 branched:linear ratio. The mixture was purified by flash column

chromatography (97:3 hexanes:EtOAc) to give **5m** as a white amorphous solid in 84% yield (0.136 g, 0.421 mmol). The enantiomeric excess was determined by HPLC analysis (254 nm, 25 °C)  $t_{\text{R}}$  4.6 min (minor);  $t_{\text{R}}$  5.8 min (major) [Chiracel AD-H (0.46 cm x 25 cm)(from Daicel Chemical Ind., Ltd.) hexane/*i*-PrOH, 95:5, 1.0 mL/min] to be 99%.  $[\alpha]_{\text{D}}^{26} = +62.4^\circ$  (c 1.10,  $\text{CHCl}_3$ ).  $^1\text{H}$  NMR ( $\text{CDCl}_3$ , 500 MHz)  $\delta$  1.43 (t,  $J = 7.0$  Hz, 3H), 4.40 (q,  $J = 7.0$  Hz, 2H), 5.24 (dd,  $J = 17.0, 1.0$  Hz, 1H), 5.43 (dd,  $J = 10.5, 1.0$  Hz, 1H), 6.58 (ddd,  $J = 17.0, 10.5, 7.0$  Hz, 1H), 6.88 (dt,  $J = 2.5, 9.0$  Hz, 1H), 7.01 (dd,  $J = 9.0, 4.0$  Hz, 1H), 7.22-7.34 (m, 6H), 7.40 (s, 1H), 7.61 (d,  $J = 7.0$  Hz, 1H).  $^{13}\text{C}$  NMR ( $\text{CDCl}_3$ , 125 MHz)  $\delta$  14.5, 60.7, 61.0, 106.8 (d,  $J_{\text{CF}} = 22.9$  Hz), 111.5, (d,  $J_{\text{CF}} = 4.5$  Hz), 113.8 (d,  $J_{\text{CF}} = 26.6$  Hz), 115.1 (d,  $J_{\text{CF}} = 9.1$  Hz), 119.5, 127.0,

127.1, 127.5, 128.8, 129.5, 134.96, 135.04, 139.6, 158.1 (d,  $J_{CF} = 237.5$  Hz), 162.3. Anal. Calcd. for  $C_{20}H_{18}FNO_2$ : C, 74.29; H, 5.61, N, 4.33; found: C, 74.05; H, 5.79; N, 4.23.

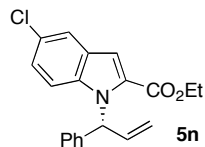

**(R)-Ethyl 5-chloro-1-(1-phenylallyl)-1H-indole-2-carboxylate (5n)**: Prepared according to the general procedure from **3a** (0.117 g, 0.500 mmol) and **4d** (0.123 g, 0.550 mmol) (reaction time = 6 h).  $^1H$  NMR spectroscopy showed a 95:5 branched:linear ratio. The mixture was purified by flash column chromatography (97:3 hexanes:EtOAc) to give **5n** as a white amorphous solid in 91% yield (0.154 g, 0.454 mmol). The enantiomeric excess was determined by HPLC analysis (254 nm, 25 °C)  $t_R$  4.9 min (minor);  $t_R$  5.8 min (major) [Chiracel AD-H (0.46 cm x 25 cm)(from Daicel Chemical Ind., Ltd.) hexane/*i*-PrOH, 95:5, 1.0 mL/min] to be 99%.  $[\alpha]_D^{26} = +46.9^\circ$  (c 1.02,  $CHCl_3$ ).  $^1H$  NMR ( $CDCl_3$ , 500 MHz)  $\delta$  1.43 (t,  $J = 7.0$  Hz, 3H), 4.39 (q,  $J = 7.0$  Hz, 2H), 5.22 (d,  $J = 17.0$  Hz, 1H), 5.43 (d,  $J = 10.5$  Hz, 1H), 6.57 (ddd,  $J = 17.0, 10.0, 7.0$  Hz, 1H), 6.99 (d,  $J = 9.0$  Hz, 1H), 7.05 (dd,  $J = 7.0, 1.5$  Hz, 1H), 7.21 (d,  $J = 7.0$  Hz, 2H), 7.27-7.34 (m, 3H), 7.37 (s, 1H), 7.60 (d,  $J = 7.0$  Hz, 1H), 7.65 (d,  $J = 1.5$  Hz, 1H).  $^{13}C$  NMR ( $CDCl_3$ , 125 MHz)  $\delta$  14.6, 60.8, 61.2, 111.2, 115.3, 119.6, 122.0, 125.2, 126.6, 127.0, 127.7, 127.8, 128.9, 129.4, 134.9, 136.8, 139.5, 162.3. Anal. Calcd. for  $C_{20}H_{18}ClNO_2$ : C, 70.69; H, 5.34, N, 4.12; found: C, 70.84; H, 5.49; N, 4.00.

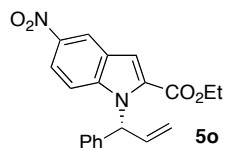

**(R)-Ethyl 5-nitro-1-(1-phenylallyl)-1H-indole-2-carboxylate (5o)**: Prepared according to a modified version of the general procedure from methyl cinnamyl carbonate (0.0961 g, 0.500 mmol) and **4e** (0.129 g, 0.550 mmol) (reaction time = 6 h).  $^1H$  NMR spectroscopy showed a 94:6 branched:linear ratio. The mixture was purified by flash column chromatography (95:5 hexanes:EtOAc) to give **5o** as a pale yellow amorphous solid in 90% yield (0.158 g, 0.451 mmol). The enantiomeric excess was determined by HPLC analysis (254 nm, 25 °C)  $t_R$  7.8 min (minor);  $t_R$  10.3 min (major) [Chiracel AD-H (0.46 cm x 25 cm)(from Daicel Chemical Ind., Ltd.) hexane/*i*-PrOH, 95:5, 1.0 mL/min] to be 99%.  $[\alpha]_D^{25} = +36.6^\circ$  (c 1.46,  $CHCl_3$ ).  $^1H$  NMR ( $CDCl_3$ , 500 MHz)  $\delta$  1.43 (t,  $J = 7.0$  Hz, 3H), 4.41 (q,  $J = 7.0$  Hz, 2H), 5.21 (d,  $J = 17.0$  Hz, 1H), 5.46 (d,  $J = 10.0$  Hz, 1H), 6.56 (ddd,  $J = 17.0, 10.0, 6.5$  Hz, 1H), 7.11 (d,  $J = 9.0$  Hz, 1H), 7.20 (d,  $J = 7.5$  Hz, 2H), 7.26-7.34 (m, 3H), 7.57 (s, 1H), 7.64 (d,  $J = 7.0$  Hz, 1H), 7.95 (dd,  $J = 9.0, 2.0$  Hz, 1H), 8.63 (d,  $J = 2.0$  Hz, 1H).  $^{13}C$  NMR ( $CDCl_3$ , 125 MHz)  $\delta$  14.4, 61.1, 61.5, 113.6, 114.2, 119.5, 119.9, 120.0, 125.9, 126.9, 127.9, 128.9, 131.4, 134.3, 138.8, 140.8, 142.4, 161.7. Anal. Calcd. for  $C_{20}H_{18}N_2O_4$ : C, 68.56; H, 5.18, N, 8.00; found: C, 68.63; H, 5.25; N, 7.97.

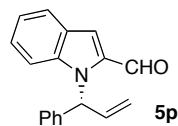

**(R)-1-(1-Phenylallyl)-1H-indole-2-carbaldehyde (5p)**: Prepared according to the general procedure from **3a** (0.117 g, 0.500 mmol) and **4f** (0.0798 g, 0.550 mmol) (reaction time = 6 h).  $^1H$  NMR spectroscopy showed a 98:2 branched:linear ratio. The mixture was purified by flash column chromatography (95:5 hexanes:EtOAc) to give **5p** as a yellow oil in 89% yield (0.117 g, 0.447 mmol). The enantiomeric excess was determined by HPLC analysis (254 nm, 25 °C)  $t_R$  6.3 min (minor);  $t_R$  6.9 min (major) [Chiracel AD-H (0.46 cm x 25 cm)(from Daicel Chemical Ind., Ltd.) hexane/*i*-PrOH, 98:2, 1.0 mL/min] to be 99%.  $[\alpha]_D^{25} = +27.8^\circ$  (c 1.32,  $CHCl_3$ ).  $^1H$  NMR ( $CDCl_3$ , 500 MHz)  $\delta$  5.10 (d,  $J = 17.0$  Hz, 1H), 5.52 (d,  $J = 10.5$  Hz, 1H), 6.18 (d,  $J = 5.5$  Hz, 1H), 6.38 (ddd,  $J = 17.0, 10.5, 5.5$  Hz, 1H), 7.23-7.42 (m, 8H), 7.74 (s, 1H), 8.36 (dd,  $J = 8.5, 1.5$  Hz, 1H), 10.0 (s, 1H).  $^{13}C$  NMR ( $CDCl_3$ , 125 MHz)  $\delta$  60.9, 114.2, 119.6, 119.8, 121.2, 123.7, 126.7, 127.1,

127.4, 127.6, 128.7, 135.0, 135.7, 139.3, 139.9, 183.0. Anal. Calcd. for C<sub>18</sub>H<sub>15</sub>NO: C, 82.73; H, 5.79, N, 5.36; found: C, 82.57; H, 5.74; N, 5.22.

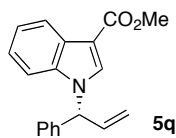

**(R)-Methyl 1-(1-phenylallyl)-1H-indole-3-carboxylate (5q):** Prepared according to the general procedure from **3a** (0.117 g, 0.500 mmol) and **4g** (0.0963 g, 0.550 mmol) (reaction time = 3 h). <sup>1</sup>H NMR spectroscopy showed a 96:4 branched:linear ratio. The mixture was purified by flash column chromatography (90:10 hexanes:EtOAc) to give **5q** as a colorless oil in 84% yield (0.123 g, 0.422 mmol). The enantiomeric excess was determined by HPLC analysis (254 nm, 25 °C) t<sub>R</sub> 9.2 min (minor); t<sub>R</sub> 11.1 min (major) [Chiracel AD-H (0.46 cm x 25 cm)(from Daicel Chemical Ind., Ltd.) hexane/*i*-PrOH, 95:5, 1.0 mL/min] to be 97%. [α]<sub>D</sub><sup>25</sup> = -25.7° (c 1.23, CHCl<sub>3</sub>). <sup>1</sup>H NMR (CDCl<sub>3</sub>, 500 MHz) δ 3.92 (s, 3H), 5.07 (d, *J* = 17.0 Hz, 1H), 5.47 (d, *J* = 10.5 Hz, 1H), 6.15 (d, *J* = 5.5 Hz, 1H), 6.36 (ddd, *J* = 17.0, 10.5, 5.5 Hz, 1H), 7.20-7.38 (m, 8H), 7.88 (s, 1H), 8.24 (d, *J* = 8.0 Hz, 1H). <sup>13</sup>C NMR (CDCl<sub>3</sub>, 125 MHz) δ 51.1, 62.6, 110.9, 120.1, 121.9, 122.3, 123.0, 127.0, 127.7, 128.5, 129.1, 133.0, 135.3, 136.8, 137.8, 165.7. Anal. Calcd. for C<sub>19</sub>H<sub>17</sub>NO<sub>2</sub>: C, 78.33; H, 5.88, N, 4.81; found: C, 78.19; H, 6.16; N, 4.73.

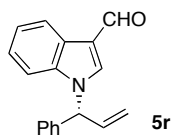

**(R)-1-(1-Phenylallyl)-1H-indole-3-carbaldehyde (5r):** Prepared according to the general procedure from **3a** (0.117 g, 0.500 mmol) and **4h** (0.0798 g, 0.550 mmol) (reaction time = 3 h). <sup>1</sup>H NMR spectroscopy showed a 94:6 branched:linear ratio. The mixture was purified by flash column chromatography (80:20 hexanes:EtOAc) to give **5r** as a tan amorphous solid in 87% yield (0.114 g, 0.436 mmol). The enantiomeric excess was determined by HPLC analysis (254 nm, 25 °C) t<sub>R</sub> 15.2 min (minor); t<sub>R</sub> 21.7 min (major) [Chiracel AD-H (0.46 cm x 25 cm)(from Daicel Chemical Ind., Ltd.) hexane/*i*-PrOH, 95:5, 1.0 mL/min] to be 96%. [α]<sub>D</sub><sup>25</sup> = +1.3° (c 1.21, CHCl<sub>3</sub>). <sup>1</sup>H NMR (CDCl<sub>3</sub>, 500 MHz) δ 5.08 (d, *J* = 17.0 Hz, 1H), 5.50 (d, *J* = 10.0 Hz, 1H), 6.17 (d, *J* = 6.0 Hz, 1H), 6.37 (ddd, *J* = 17.0, 10.0, 6.0 Hz, 1H), 7.22-7.41 (m, 8H), 7.73 (s, 1H), 8.36 (d, *J* = 7.5 Hz, 1H), 9.99 (s, 1H). <sup>13</sup>C NMR (CDCl<sub>3</sub>, 125 MHz) δ 62.7, 111.0, 118.4, 120.3, 122.2, 123.2, 124.1, 125.7, 127.8, 128.8, 129.2, 134.9, 137.2, 137.3, 137.5, 184.8. Anal. Calcd. for C<sub>18</sub>H<sub>15</sub>NO: C, 82.73; H, 5.79, N, 5.36; found: C, 82.76; H, 5.84; N, 5.30.

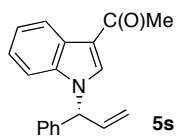

**(R)-1-(1-(1-Phenylallyl)-1H-indol-3-yl)ethanone (5s):** Prepared according to the general procedure from **3a** (0.117 g, 0.500 mmol) and **4i** (0.0875 g, 0.550 mmol) (reaction time = 5 h). <sup>1</sup>H NMR spectroscopy showed a 98:2 branched:linear ratio. The mixture was purified by flash column chromatography (75:25 hexanes:EtOAc) to give **5s** as a colorless oil in 88% yield (0.122 g, 0.442 mmol). The enantiomeric excess was determined by HPLC analysis (254 nm, 25 °C) t<sub>R</sub> 15.0 min (minor); t<sub>R</sub> 20.0 min (major) [Chiracel AD-H (0.46 cm x 25 cm)(from Daicel Chemical Ind., Ltd.) hexane/*i*-PrOH, 95:5, 1.0 mL/min] to be 96%. [α]<sub>D</sub><sup>25</sup> = -19.9° (c 0.73, CHCl<sub>3</sub>). <sup>1</sup>H NMR (CDCl<sub>3</sub>, 500 MHz) δ 2.52 (s, 3H), 5.10 (d, *J* = 17.0 Hz, 1H), 5.51 (d, *J* = 10.0 Hz, 1H), 6.16 (d, *J* = 5.5 Hz, 1H), 6.39 (ddd, *J* = 17.0, 10.0, 5.5 Hz, 1H), 7.20-7.40 (m, 8H), 7.77 (s, 1H), 8.43 (d, *J* = 7.5 Hz, 1H). <sup>13</sup>C NMR (CDCl<sub>3</sub>, 125 MHz) δ 27.8, 62.6, 110.8, 117.5, 120.3, 122.7, 122.9, 123.4, 126.7, 127.6, 128.6, 129.1, 133.4, 135.1, 137.1, 137.7, 193.3. Anal. Calcd. for C<sub>19</sub>H<sub>17</sub>NO: C, 82.88; H, 6.22, N, 5.09; found: C, 82.94; H, 6.05; N, 4.96.

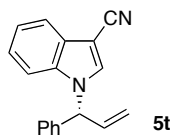

**(R)-1-(1-Phenylallyl)-1H-indole-3-carbonitrile (5t):** Prepared according to the general procedure from **3a** (0.117 g, 0.500 mmol) and **4j** (0.0782 g, 0.550 mmol) (reaction time = 3 h). <sup>1</sup>H NMR spectroscopy showed a 96:4 branched:linear ratio.

The mixture was purified by flash column chromatography (85:15 hexanes:EtOAc) to give **5t** as a white amorphous solid in 93% yield (0.120 g, 0.465 mmol). The enantiomeric excess was determined by HPLC analysis (254 nm, 25 °C) *t<sub>R</sub>* 14.9 min (minor); *t<sub>R</sub>* 15.9 min (major) [Chiracel AD-H (0.46 cm x 25 cm)(from Daicel Chemical Ind., Ltd.) hexane/*i*-PrOH, 98:2, 1.0 mL/min] to be 96%.  $[\alpha]_D^{25} = -5.6^\circ$  (c 1.07, CHCl<sub>3</sub>). <sup>1</sup>H NMR (CDCl<sub>3</sub>, 500 MHz) δ 5.06 (d, *J* = 17.0 Hz, 1H), 5.50 (d, *J* = 10.0 Hz, 1H), 6.17 (d, *J* = 6.0 Hz, 1H), 6.33 (ddd, *J* = 17.0, 10.0, 6.0 Hz, 1H), 7.20-7.41 (m, 8H), 7.60 (s, 1H), 7.77-7.79 (m, 1H). <sup>13</sup>C NMR (CDCl<sub>3</sub>, 125 MHz) δ 62.8, 86.2, 111.5, 116.1, 120.0, 120.4, 122.5, 124.0, 127.7, 128.2, 128.9, 129.2, 133.7, 134.8, 135.6, 137.2. Anal. Calcd. for C<sub>18</sub>H<sub>14</sub>N<sub>2</sub>: C, 83.69; H, 5.46, N, 10.84; found: C, 83.59; H, 5.64; N, 10.79.

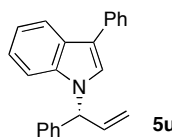

**(R)-3-Phenyl-1-(1-phenylallyl)-1H-indole (5u):** Prepared according to the general procedure from **3a** (0.117 g, 0.500 mmol) and **4k** (0.106 g, 0.550 mmol) (reaction time = 6 h). <sup>1</sup>H NMR spectroscopy showed a 99:1 branched:linear ratio.

The mixture was purified by flash column chromatography (97:3 hexanes:EtOAc) to give **5u** as a pale yellow oil in 21% yield (0.0332 g, 0.107 mmol). The enantiomeric excess was determined by HPLC analysis (254 nm, 25 °C) *t<sub>R</sub>* 5.7 min (minor); *t<sub>R</sub>* 6.1 min (major) [Chiracel AD-H (0.46 cm x 25 cm)(from Daicel Chemical Ind., Ltd.) hexane/*i*-PrOH, 98:2, 1.0 mL/min] to be 97%.  $[\alpha]_D^{25} = -41.0^\circ$  (c 0.42, CHCl<sub>3</sub>). <sup>1</sup>H NMR (CDCl<sub>3</sub>, 500 MHz) δ 5.12 (d, *J* = 17.0 Hz, 1H), 5.45 (d, *J* = 10.5 Hz, 1H), 6.18 (d, *J* = 6.0 Hz, 1H), 6.42 (ddd, *J* = 17.0, 10.5, 6.0 Hz, 1H), 7.18-7.36 (m, 10H), 7.44 (t, *J* = 7.5 Hz, 2H), 7.67 (d, *J* = 7.5 Hz, 2H), 7.98 (dd, *J* = 7.5, 1.5 Hz, 1H). <sup>13</sup>C NMR (CDCl<sub>3</sub>, 125 MHz) δ 62.2, 110.6, 117.4, 119.4, 120.2, 120.5, 122.2, 124.2, 126.0, 126.8, 127.6, 127.8, 128.2, 128.9, 129.0, 135.8, 136.2, 137.1, 139.0. Anal. Calcd. for C<sub>23</sub>H<sub>19</sub>N: C, 89.28; H, 6.19, N, 4.53; found: C, 89.78; H, 6.13; N, 4.41.

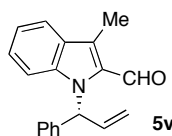

**(R)-3-Methyl-1-(1-phenylallyl)-1H-indole-2-carbaldehyde (5v):** Prepared according to the general procedure from **3a** (0.117 g, 0.500 mmol) and **4l** (0.0875 g, 0.550 mmol) (reaction time = 6 h). <sup>1</sup>H NMR spectroscopy showed a 98:2 branched:linear ratio. The mixture was purified by flash column chromatography

(95:5 hexanes:EtOAc) to give **5v** as a pale yellow oil in 82% yield (0.113 g, 0.410 mmol). The enantiomeric excess was determined by HPLC analysis (254 nm, 25 °C) *t<sub>R</sub>* 4.9 min (minor); *t<sub>R</sub>* 5.5 min (major) [Chiracel AD-H (0.46 cm x 25 cm)(from Daicel Chemical Ind., Ltd.) hexane/*i*-PrOH, 95:5, 1.0 mL/min] to be 99%.  $[\alpha]_D^{26} = +42.4^\circ$  (c 1.01, CHCl<sub>3</sub>). <sup>1</sup>H NMR (CDCl<sub>3</sub>, 500 MHz) δ 2.70 (s, 3H), 5.25 (d, *J* = 17.0 Hz, 1H), 5.41 (d, *J* = 10.5 Hz, 1H), 6.58 (ddd, *J* = 17.0, 10.5, 6.5 Hz, 1H), 7.08 (d, *J* = 8.5 Hz, 1H), 7.13 (t, *J* = 7.5 Hz, 1H), 7.21 (t, *J* = 7.5 Hz, 1H), 7.24-7.34 (m, 5H), 7.59 (d, *J* = 6.5 Hz, 1H), 7.73 (d, *J* = 8.5 Hz, 1H), 10.22 (s, 1H). <sup>13</sup>C NMR (CDCl<sub>3</sub>, 125 MHz) δ 8.8, 60.6, 113.9, 119.3, 120.4, 121.5, 127.0, 127.2, 127.4, 128.0, 128.4, 128.7, 130.9, 135.2, 138.8, 139.7, 181.7. Anal. Calcd. for C<sub>19</sub>H<sub>17</sub>NO: C, 82.88; H, 6.22, N, 5.09; found: C, 82.83; H, 6.31; N, 5.05.

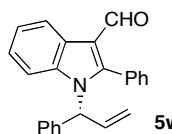

**(R)-2-Phenyl-1-(1-phenylallyl)-1H-indole-3-carbaldehyde (5w):** Prepared according to the general procedure from **3a** (0.117 g, 0.500 mmol) and **4m** (0.122 g, 0.550 mmol) (reaction time = 3 h). <sup>1</sup>H NMR spectroscopy showed a

96:4 branched:linear ratio. The mixture was purified by flash column chromatography (80:20 hexanes:EtOAc) to give **5w** as an amorphous white solid in 93% yield (0.156 g, 0.463 mmol). The enantiomeric excess was determined by HPLC analysis (254 nm, 25 °C)  $t_R$  8.7 min (major);  $t_R$  10.0 min (minor) [Chiracel AD-H (0.46 cm x 25 cm)(from Daicel Chemical Ind., Ltd.) hexane/*i*-PrOH, 95:5, 1.0 mL/min] to be 97%.  $[\alpha]_D^{26} = +194.1^\circ$  (c 1.11, CHCl<sub>3</sub>). <sup>1</sup>H NMR (CDCl<sub>3</sub>, 500 MHz)  $\delta$  5.15 (d,  $J = 17.0$  Hz, 1H), 5.48 (d,  $J = 10.5$  Hz, 1H), 6.07 (d,  $J = 6.5$  Hz, 1H), 6.57 (ddd,  $J = 17.0, 10.5, 6.5$  Hz, 1H), 7.03 (d,  $J = 8.5$  Hz, 1H), 7.12 (t,  $J = 7.5$  Hz, 1H), 7.18 (d,  $J = 7.0$  Hz, 2H), 7.27-7.34 (m, 4H), 7.50-7.60 (m, 5H), 8.49 (d,  $J = 8.0$  Hz, 1H), 9.78 (s, 1H). <sup>13</sup>C NMR (CDCl<sub>3</sub>, 125 MHz)  $\delta$  61.6, 113.7, 116.4, 120.3, 122.4, 123.2, 123.8, 126.1, 126.8, 128.1, 128.8, 129.0, 129.1 130.3, 130.9, 133.9, 135.4, 138.0, 152.1, 187.1. HRMS (ESI) calcd. for C<sub>24</sub>H<sub>20</sub>NO<sup>+</sup> [M+H]<sup>+</sup> 338.1545, found 338.1534.

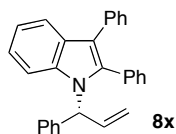

**(R)-2,3-Diphenyl-1-(1-phenylallyl)-1H-indole (5x)**: Prepared according to the general procedure from **3a** (0.117 g, 0.500 mmol) and **4n** (0.148 g, 0.550 mmol) (reaction time = 2 h). <sup>1</sup>H NMR spectroscopy showed a 98:2 branched:linear ratio.

The mixture was purified by flash column chromatography (97:3 hexanes:EtOAc) to give **5x** as an amorphous white solid in 95% yield (0.184 g, 0.477 mmol). The enantiomeric excess was determined by HPLC analysis (254 nm, 25 °C)  $t_R$  42.8 min (major);  $t_R$  48.9 min (minor) [Chiracel OD-H (0.46 cm x 25 cm)(from Daicel Chemical Ind., Ltd.) hexane/*i*-PrOH, 99.9:0.1, 0.3 mL/min] to be 99%.  $[\alpha]_D^{24} = +180.5^\circ$  (c 0.84, CHCl<sub>3</sub>). <sup>1</sup>H NMR (CDCl<sub>3</sub>, 500 MHz)  $\delta$  5.16 (dt,  $J = 17.0, 1.5$  Hz 1H), 5.46 (dt,  $J = 10.5, 1.5$  Hz, 1H), 6.11 (d,  $J = 6.5$  Hz, 1H), 6.62 (ddd,  $J = 17.0, 10.5, 6.5$  Hz, 1H), 7.08-7.18 (m, 3H), 7.24 (dt,  $J = 7.5, 1.5$  Hz, 1H), 7.30-7.45 (m, 14H), 7.87 (d,  $J = 8.0$  Hz, 1H). <sup>13</sup>C NMR (CDCl<sub>3</sub>, 125 MHz)  $\delta$  61.3, 113.4, 116.0, 119.4, 119.9, 120.3, 121.9, 125.8, 127.0, 127.6, 128.3, 128.5 (2C), 128.7, 128.8, 130.1, 131.4, 132.4, 135.0, 135.3, 135.4, 138.5, 139.6. Anal. Calcd. for C<sub>29</sub>H<sub>23</sub>N: C, 90.35; H, 6.01, N, 3.63; found: C, 90.04; H, 6.04; N, 3.43.

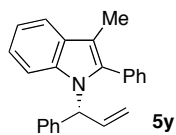

**(R)-3-Methyl-2-phenyl-1-(1-phenylallyl)-1H-indole (5y)**: Prepared according to the general procedure from **3a** (0.117 g, 0.500 mmol) and **4o** (0.114 g, 0.550 mmol) (reaction time = 4 h). <sup>1</sup>H NMR spectroscopy showed a 98:2 branched:linear ratio. The mixture was purified by flash column chromatography

(98:2 hexanes:EtOAc) to give **5y** as an amorphous white solid in 89% yield (0.143 g, 0.443 mmol). The enantiomeric excess was determined by HPLC analysis (254 nm, 25 °C)  $t_R$  3.6 min (major);  $t_R$  4.2 min (minor) [Chiracel AD-H (0.46 cm x 25 cm)(from Daicel Chemical Ind., Ltd.) hexane/*i*-PrOH, 99:1, 1.0 mL/min] to be 99%.  $[\alpha]_D^{26} = +157.5^\circ$  (c 1.13, CHCl<sub>3</sub>). <sup>1</sup>H NMR (CDCl<sub>3</sub>, 500 MHz)  $\delta$  2.34 (s, 3H), 5.10 (dt,  $J = 17.0, 1.5$  Hz, 1H), 5.39 (dt, 10.5, 1.5 Hz, 1H), 6.01 (d,  $J = 6.5$  Hz, 1H), 6.54 (ddd,  $J = 17.0, 10.5, 6.5$  Hz, 1H), 7.00 (dt,  $J = 8.0, 1.0$  Hz, 1H), 7.05 (dt,  $J = 1.0, 8.0$  Hz, 1H), 7.14 (dt,  $J = 1.0, 8.0$  Hz, 1H), 7.23-7.35 (m, 5H), 7.43-7.49 (m, 5H), 7.65 (dt,  $J = 8.0, 1.0$  Hz, 1H). <sup>13</sup>C NMR (CDCl<sub>3</sub>, 125 MHz)  $\delta$  9.7, 61.3, 109.6, 113.1, 119.0, 119.1, 119.4, 121.5, 127.0, 127.4, 128.3, 128.6, 128.7, 129.8, 130.8, 132.6, 135.2, 135.4, 138.5, 139.9. Anal. Calcd. for C<sub>24</sub>H<sub>21</sub>N: C, 89.12; H, 6.54, N, 4.33; found: C, 88.89; H, 6.42; N, 4.25.

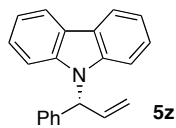

**(R)-9-(1-Phenylallyl)-9H-carbazole (5z)**: Prepared according to the general procedure from **3a** (0.117 g, 0.500 mmol) and **4p** (0.0920 g, 0.550 mmol) (reaction time = 5 h). <sup>1</sup>H NMR spectroscopy showed a 98:2 branched:linear ratio. The mixture was purified by flash column chromatography (98:2

hexanes:EtOAc) to give **5z** as an amorphous white solid in 88% yield (0.125 g, 0.441 mmol). The enantiomeric excess was determined by HPLC analysis (254 nm, 25 °C)  $t_R$  6.0 min (minor);  $t_R$  6.9 min (major) [Chiracel AD-H (0.46 cm x 25 cm)(from Daicel Chemical Ind., Ltd.) hexane/*i*-PrOH, 98:2, 1.0 mL/min] to be 98%.  $[\alpha]_D^{25} = +55.7^\circ$  (c 1.10, CHCl<sub>3</sub>). <sup>1</sup>H NMR (CDCl<sub>3</sub>, 500 MHz)  $\delta$  5.33 (dt,  $J = 17.0, 1.5$  Hz, 1H), 5.50 (dt,  $J = 10.5, 1.5$  Hz, 1H), 6.55 (d,  $J = 6.5$  Hz, 1H), 6.68 (ddd,  $J = 17.0, 10.5, 6.5$  Hz, 1H), 7.33 (dt,  $J = 1.0, 8.0$  Hz, 2H), 7.36-7.41 (m, 7H), 7.44 (dt,  $J = 1.5, 8.0$  Hz, 2H), 8.22 (d,  $J = 8.0$  Hz, 2H). <sup>13</sup>C NMR (CDCl<sub>3</sub>, 125 MHz)  $\delta$  60.4, 110.6, 119.3, 119.4, 120.5, 123.6, 125.7, 127.3, 127.8, 128.9, 134.4, 138.7, 140.2. Anal. Calcd. for C<sub>21</sub>H<sub>17</sub>N: C, 89.01; H, 6.05, N, 4.94; found: C, 89.09; H, 6.06; N, 4.91.

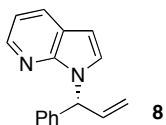

**(R)-1-(1-Phenylallyl)-1H-pyrrolo[2,3-b]pyridine (8)**: Prepared according to the general procedure from **3a** (0.117 g, 0.500 mmol) and **7** (0.0650 g, 0.550 mmol) (reaction time = 6 h). <sup>1</sup>H NMR spectroscopy showed a 91:9 branched:linear ratio.

The mixture was purified by flash column chromatography (90:10 hexanes:EtOAc) to give **8** as a colorless oil in 79% yield (0.0921 g, 0.393 mmol). The enantiomeric excess was determined by HPLC analysis (254 nm, 25 °C)  $t_R$  5.3 min (major);  $t_R$  6.3 min (minor) [Chiracel AD-H (0.46 cm x 25 cm)(from Daicel Chemical Ind., Ltd.) hexane/*i*-PrOH, 95:5, 1.0 mL/min] to be 99%.  $[\alpha]_D^{25} = +201.4^\circ$  (c 1.15, CHCl<sub>3</sub>). <sup>1</sup>H NMR (CDCl<sub>3</sub>, 500 MHz)  $\delta$  5.06 (dt,  $J = 17.0, 1.5$  Hz, 1H), 5.42 (dt,  $J = 10.5, 1.5$  Hz, 1H), 6.44 (ddd,  $J = 17.0, 10.5, 6.0$  Hz, 1H), 6.53 (d,  $J = 4.0$  Hz, 1H), 6.89 (d,  $J = 5.0$  Hz, 1H), 7.11 (dd,  $J = 7.5, 5.0$  Hz, 1H), 7.23 (d,  $J = 6.0$  Hz, 1H), 7.30-7.38 (m, 5H), 7.95 (dd,  $J = 8.0, 2.0$  Hz, 1H), 8.40 (dd,  $J = 5.0, 2.0$  Hz, 1H). <sup>13</sup>C NMR (CDCl<sub>3</sub>, 125 MHz)  $\delta$  58.9, 100.1, 116.2, 118.3, 120.7, 126.4, 127.91, 127.92, 128.7, 128.9, 136.6, 139.5, 143.0, 147.6. Anal. Calcd. for C<sub>16</sub>H<sub>14</sub>N<sub>2</sub>: C, 82.02; H, 6.02, N, 11.96; found: C, 82.14; H, 6.27; N, 11.67.

### Synthesis of (R)-Methyl 1-(3-hydroxy-1-phenylpropyl)-1H-indole-3-carboxylate (10)

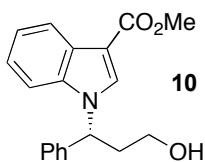

*N*-Allyl indole **5q** (0.797 g, 2.74 mmol, 97% ee) was dissolved in dry, degassed THF (11 mL) and cooled to -78 °C. Then 9-BBN (11 mL as a 0.5 M solution in THF, 5.5 mmol) was added to the reaction vessel. The reaction mixture was stirred for 1 h at -78 °C, then allowed to warm slowly to room temperature and stirred overnight. The resulting solution was cooled to 0 °C, at which time EtOH (4.4 mL), 3 M NaOH (2.2 mL), and 30% H<sub>2</sub>O<sub>2</sub> (2.3 mL) were added in the specified order. The reaction was allowed to warm to room temperature and was stirred for an additional 6 h. The reaction was diluted with ether, then washed with 1 M NaOH and saturated aqueous NH<sub>4</sub>Cl. The organic layer was dried over MgSO<sub>4</sub>, filtered, and concentrated. The crude product was purified by flash column silica gel chromatography (40:60 hexanes:EtOAc) to give (*R*)-methyl 1-(3-hydroxy-1-phenylpropyl)-1H-indole-3-carboxylate **10** as an amorphous white solid in 97% yield (0.820 g, 2.65 mmol). The enantiomeric excess was determined by HPLC analysis (254 nm, 25 °C)  $t_R$  13.9 min (minor);  $t_R$  15.4 min (major) [Chiracel AD-H (0.46 cm x 25 cm)(from Daicel Chemical Ind., Ltd.) hexane/*i*-PrOH, 90:10, 1.0 mL/min] to be 97%.  $[\alpha]_D^{25} = +1.9^\circ$  (c 0.96, CHCl<sub>3</sub>). <sup>1</sup>H NMR (CDCl<sub>3</sub>, 500 MHz)  $\delta$  1.94 (br s, 1H), 2.49-2.60 (m, 2H), 3.54 (ddd,  $J = 11.0, 7.0, 5.0$  Hz, 1H), 3.66 (ddd,  $J = 11.0, 5.0, 5.0$  Hz, 1H), 3.92 (s, 3H), 5.84 (dd,  $J = 8.0, 7.5$  Hz, 1H), 7.19-7.32 (m, 7H), 7.39 (d,  $J = 8.0$  Hz, 1H), 8.05 (s, 1H), 8.18 (d,  $J = 7.5$  Hz, 1H). <sup>13</sup>C NMR (CDCl<sub>3</sub>, 125 MHz)  $\delta$  37.4, 51.3, 56.8, 58.8, 107.8, 110.9, 121.8, 122.3, 123.1, 126.7,

126.8, 128.3, 129.1, 132.0, 137.1, 139.9, 165.9. Anal. Calcd. for C<sub>19</sub>H<sub>19</sub>NO<sub>3</sub>: C, 73.77; H, 6.19, N, 4.53; found: C, 73.49; H, 6.13; N, 4.34.

### Synthesis of (*R*)-3-(1*H*-Indol-1-yl)-3-phenylpropan-1-ol<sup>10</sup>

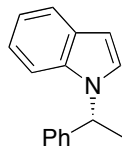

(*R*)-Methyl 1-(3-hydroxy-1-phenylpropyl)-1*H*-indole-3-carboxylate **10** (0.400 g, 1.29 mmol) and solid KOH (0.290 g, 5.17 mmol) were combined in a reaction vessel. To this mixture was added MeOH (12 mL) and H<sub>2</sub>O (8 mL). The reaction was heated at reflux for 4 h, then cooled to room temperature. The solution was transferred to a separatory funnel, acidified with 3 M HCl, and extracted three times with CH<sub>2</sub>Cl<sub>2</sub>. The organic layer was dried over MgSO<sub>4</sub>, filtered, and concentrated. (*R*)-1-(3-Hydroxy-1-phenylpropyl)-1*H*-indole-3-carboxylic acid was isolated as an amorphous white solid in 96% yield (0.367 g, 1.24 mmol). The enantiomeric excess was determined by HPLC analysis (254 nm, 25 °C) *t*<sub>R</sub> 26.6 min (minor); *t*<sub>R</sub> 34.1 min (major) [Chiracel AD-H (0.46 cm x 25 cm)(from Daicel Chemical Ind., Ltd.) hexane/*i*-PrOH, 90:10, 1.0 mL/min] to be 97%. <sup>1</sup>H NMR (CDCl<sub>3</sub>, 500 MHz) δ 2.52-2.65 (m, 2H), 3.60 (ddd, *J* = 11.0, 7.0, 5.0 Hz, 1H), 3.71 (ddd, *J* = 11.0, 5.0, 5.0, 1H), 5.87 (app t, *J* = 7.5 Hz, 1H), 7.22-7.35 (m, 7H), 7.41 (d, *J* = 8.0 Hz, 1H), 8.16 (s, 1H), 8.24 (d, *J* = 8.0 Hz, 1H). <sup>13</sup>C NMR (CDCl<sub>3</sub>, 125 MHz) δ 37.4, 56.7, 58.9, 107.3, 111.0, 122.0, 122.6, 123.3, 126.7, 127.1, 128.4, 129.2, 133.3, 137.3, 139.7, 170.6. HRMS (ESI) calcd. for C<sub>18</sub>H<sub>18</sub>NO<sub>3</sub><sup>+</sup> [M+H]<sup>+</sup> 296.1287, found 296.1296. (*R*)-1-(3-Hydroxy-1-phenylpropyl)-1*H*-indole-3-carboxylic acid (0.200 g, 0.677 mmol) was dissolved in bromobenzene (5 mL). The reaction was heated at reflux for 20 h, and then was allowed to cool to room temperature. Bromobenzene was removed *in vacuo*, and the crude reaction mixture was purified by flash column silica gel chromatography (75:25 hexanes:EtOAc) to give (*R*)-3-(1*H*-indol-1-yl)-3-phenylpropan-1-ol as a green oil in 71% yield (0.120 g, 0.479 mmol). The enantiomeric excess was determined by HPLC analysis (254 nm, 25 °C) *t*<sub>R</sub> 8.3 min (major); *t*<sub>R</sub> 10.0 min (minor) [Chiracel AD-H (0.46 cm x 25 cm)(from Daicel Chemical Ind., Ltd.) hexane/*i*-PrOH, 90:10, 1.0 mL/min] to be 97%. [α]<sub>D</sub><sup>26</sup> = +112.5° (c 0.48, CHCl<sub>3</sub>). <sup>1</sup>H NMR (CDCl<sub>3</sub>, 500 MHz) δ 1.82 (br s, 1H), 2.52-2.57 (m, 2H), 3.50 (ddd, *J* = 11.0, 6.5, 5.5, 1H), 3.64 (ddd, *J* = 11.0, 5.5, 5.5 Hz, 1H), 5.82 (dd, *J* = 7.5, 7.5 Hz, 1H) 6.63 (d, *J* = 3.5 Hz, 1H), 7.14 (ddd, *J* = 8.0, 8.0, 1.0 Hz, 1H), 7.20 (ddd, *J* = 7.5, 7.5, 1.5 Hz, 1H), 7.24-7.33 (m, 6H), 7.40 (d, *J* = 8.0 Hz, 1H), 7.68 (d, *J* = 7.5 Hz, 1H). <sup>13</sup>C NMR (CDCl<sub>3</sub>, 125 MHz) δ 37.6, 55.8, 59.3, 102.2, 110.1, 119.8, 121.1, 121.8, 125.2, 126.6, 127.7, 128.7, 128.9, 136.6, 141.3. HRMS (ESI) calcd. for C<sub>17</sub>H<sub>18</sub>NO<sup>+</sup> [M+H]<sup>+</sup> 252.1388, found 252.1394.

### Synthesis of (*R*)-1-(3-Chloro-1-phenylpropyl)-1*H*-indole<sup>11</sup>

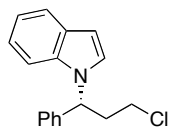

(*R*)-3-(1*H*-Indol-1-yl)-3-phenylpropan-1-ol (0.0641 g, 0.255 mmol) and PPh<sub>3</sub> (0.0803 g, 0.306 mmol) were combined in a 1-dram vial. To this mixture was added CH<sub>2</sub>Cl<sub>2</sub> (1.9 mL) and CCl<sub>4</sub> (0.1 mL). Then the vial was sealed, and the reaction heated at 50 °C. After 18 h, the reaction was cooled to room temperature and filtered through a plug of silica gel (eluting with 75:25 hexanes to EtOAc). The crude reaction mixture was concentrated under reduced pressure and purified by flash column silica gel chromatography (95:5 hexanes:EtOAc) to give (*R*)-1-(3-chloro-1-phenylpropyl)-1*H*-indole as a colorless oil in 91% yield (0.0624 g, 0.231 mmol). The enantiomeric excess was determined by HPLC analysis (254 nm, 25 °C) *t*<sub>R</sub> 5.5 min (major); *t*<sub>R</sub> 6.0 min (minor) [Chiracel AD-H (0.46 cm

x 25 cm)(from Daicel Chemical Ind., Ltd.) hexane/*i*-PrOH, 95:5, 1.0 mL/min] to be 97%.  $[\alpha]_D^{25} = +106.0^\circ$  (c 0.65, CHCl<sub>3</sub>). <sup>1</sup>H NMR (CDCl<sub>3</sub>, 500 MHz)  $\delta$  2.74 (m, 1H), 2.85 (m, 1H), 3.41 (ddd,  $J = 11.5, 8.0, 4.5$ , 1H), 3.56 (ddd,  $J = 11.5, 5.5, 5.5$  Hz, 1H), 5.87 (dd,  $J = 9.0, 5.5$  Hz, 1H), 6.63 (dd,  $J = 3.0, 0.5$  Hz, 1H), 7.14 (ddd,  $J = 8.0, 8.0, 1.0$  Hz, 1H), 7.21 (ddd,  $J = 8.0, 8.0, 1.0$  Hz, 1H), 7.24-7.36 (m, 6H), 7.39 (dd,  $J = 8.0, 0.5$  Hz, 1H), 7.67 (dd,  $J = 8.0, 0.5$  Hz, 1H). <sup>13</sup>C NMR (CDCl<sub>3</sub>, 125 MHz)  $\delta$  37.7, 41.7, 56.4, 102.6, 110.2, 120.0, 121.2, 122.0, 125.1, 126.6, 128.1, 128.9, 129.1, 136.5, 140.3. HRMS (ESI) calcd. for C<sub>17</sub>H<sub>17</sub>NCl<sup>+</sup> [M+H]<sup>+</sup> 270.1050, found 270.1047.

### Synthesis of (*R*)-3-(1*H*-Indol-1-yl)-*N*-methyl-3-phenylpropan-1-amine (**11**)<sup>11</sup>

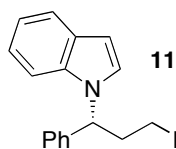

To (*R*)-1-(3-chloro-1-phenylpropyl)-1*H*-indole (0.0613 g, 0.227 mmol) in a 10 mL medium-walled pressure vessel equipped with a vacuum valve was added methylamine (33% in EtOH, 2.5 mL). The pressure vessel was sealed and heated at 90 °C for 4 h. The reaction mixture was concentrated under reduced pressure and purified by flash column silica gel chromatography (90:10 CHCl<sub>3</sub>:MeOH) to give (*R*)-3-(1*H*-indol-1-yl)-*N*-methyl-3-phenylpropan-1-amine **11** as a white amorphous solid in 95% yield (0.0573 g, 0.217 mmol). The enantiomeric excess was determined by HPLC analysis (254 nm, 25 °C)  $t_R$  8.5 min (minor);  $t_R$  13.4 min (major) [Chiracel AD-H (0.46 cm x 25 cm)(from Daicel Chemical Ind., Ltd.) hexane/*i*-PrOH, 95:5, 1.0 mL/min] to be 97%.  $[\alpha]_D^{24} = +76.6^\circ$  (c 0.49, MeOH). <sup>1</sup>H NMR (DMSO-*d*<sub>6</sub>, 500 MHz)  $\delta$  2.48 (s, 3H), 2.57-2.61 (m, 1H), 2.69-2.84 (m, 3H), 3.40 (br s, 1H), 5.92 (dd,  $J = 9.0, 6.0$  Hz, 1H), 6.56 (d,  $J = 3.5$  Hz, 1H), 7.01 (t,  $J = 8.0$  Hz, 1H), 7.10 (t,  $J = 8.5$  Hz, 1H), 7.24-7.37 (m, 5H), 7.54 (d,  $J = 8.0$  Hz, 1H), 7.55 (d,  $J = 8.5$  Hz, 1H), 7.76 (d,  $J = 3.5$  Hz, 1H). <sup>13</sup>C NMR (DMSO-*d*<sub>6</sub>, 125 MHz)  $\delta$  31.1, 32.7, 46.0, 56.1, 101.8, 110.4, 119.4, 120.5, 121.2, 125.4, 126.4, 127.7, 128.2, 128.6, 135.9, 141.1. HRMS (ESI) calcd. for C<sub>18</sub>H<sub>21</sub>N<sub>2</sub><sup>+</sup> [M+H]<sup>+</sup> 265.1705, found 265.1703.

### General Procedure for the Synthesis of 3-(1*H*-indol-1-yl)-*N*-methyl-3-arylpropan-1-amines **12a-12c**

*N*-allyl indole **5x**, **5y**, or **5z** (0.400 mmol) and Cp<sub>2</sub>ZrHCl (0.103 g, 0.400 mmol) were added to a 1-dram vial. Then, dry, degassed THF (2 mL) was added, and the vial was sealed with a cap containing a PTFE/silicone liner. The heterogeneous solution was stirred at room temperature until the mixture became homogeneous (5-15 h). Then, the septum cap was removed from the vial, *N*-methyl hydroxylamine-*O*-sulfonic acid (0.0763 g, 0.600 mmol) was added to the reaction mixture, and the vial was resealed. The vial was removed from the dry-box, and the reaction was heated in an oil bath at 60 °C for 5 h. The reaction was cooled to room temperature, diluted with CH<sub>2</sub>Cl<sub>2</sub>, and transferred to separatory funnel. The organic layer was washed with 1 M NaOH, dried over MgSO<sub>4</sub>, filtered, and concentrated. The crude product was purified by flash column silica gel chromatography (90:10 CHCl<sub>3</sub>:MeOH) to give **12a**, **12b**, or **12c**.

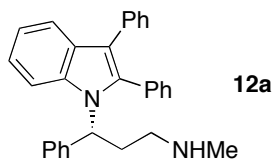

**(*R*)-3-(2,3-Diphenyl-1*H*-indol-1-yl)-*N*-methyl-3-phenylpropan-1-amine (**12a**):** Prepared according to the general procedure from **5x** (0.154 g, 0.400 mmol) to give **12a** as an amorphous white solid in 63% yield (0.105 g, 0.253 mmol). The enantiomeric excess after acylation with trifluoroacetic anhydride was determined by HPLC analysis (254 nm, 25



$^{\circ}\text{C}$ )  $t_{\text{R}}$  23.3 min (minor);  $t_{\text{R}}$  30.0 min (major) [Chiracel OD-H (0.46 cm x 25 cm)(from Daicel Chemical Ind., Ltd.) hexane/*i*-PrOH, 98:2, 0.5 mL/min] to be 99%.  $[\alpha]_{\text{D}}^{26} = +162.7^{\circ}$  (c 0.59,  $\text{CHCl}_3$ ).  $^1\text{H}$  NMR ( $\text{CDCl}_3$ , 500 MHz)  $\delta$  2.17-2.23 (m, 1H), 2.25 (s, 3H), 2.29-2.35 (m, 1H), 2.49 (br s, 1H), 2.54-2.61 (m, 1H), 2.71-2.79 (m, 1H), 5.63 (dd,  $J = 11.0, 4.5$  Hz, 1H), 7.10-7.23 (m, 4H), 7.27-7.41 (m, 14H), 7.84 (d,  $J = 8.0$  Hz, 1H).  $^{13}\text{C}$  NMR ( $\text{CDCl}_3$ , 125 MHz)  $\delta$  32.2, 36.0, 48.5, 56.3, 113.2, 115.9, 120.1, 120.5, 122.1, 125.8, 126.5, 127.4, 128.3, 128.46, 128.51, 128.8, 128.9, 130.2, 131.1, 131.2, 132.2, 135.2, 139.0, 140.8. Anal. Calcd. for  $\text{C}_{30}\text{H}_{29}\text{N}_2$ : C, 86.50; H, 6.78, N, 6.72; found: C, 86.90; H, 6.69; N, 6.45.

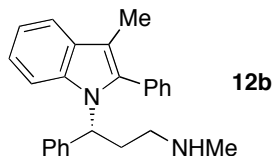

**(R)-N-Methyl-3-(3-methyl-2-phenyl-1H-indol-1-yl)-3-phenylpropan-1-amine (12b)**: Prepared according to the general procedure from **5y** (0.129 g, 0.400 mmol) to give **12b** as an amorphous white solid in 69% yield (0.0981 g, 0.276 mmol). The enantiomeric excess after acylation with trifluoroacetic anhydride was determined by HPLC analysis (254 nm, 25  $^{\circ}\text{C}$ )  $t_{\text{R}}$  6.9 min (minor);  $t_{\text{R}}$  9.6 min (major) [Chiracel OD-H (0.46 cm x 25 cm)(from Daicel Chemical Ind., Ltd.) hexane/*i*-PrOH, 95:5, 1.0 mL/min] to be 99%.  $[\alpha]_{\text{D}}^{24} = +173.3^{\circ}$  (c 0.48,  $\text{CHCl}_3$ ).  $^1\text{H}$  NMR ( $\text{CDCl}_3$ , 500 MHz)  $\delta$  2.09-2.22 (m, NH +  $\text{CH}_2$ , 2H), 2.23-2.29 (m,  $\text{CH}_3$  +  $\text{CH}_2$ , 4H), 2.32 (s, 3H), 2.46-2.53 (m, 1H), 2.63-2.71 (m, 1H), 5.53 (dd,  $J = 11.5, 5.0$  Hz, 1H), 7.05-7.16 (m, 3H), 7.28-7.47 (m, 10H), 7.66 (d,  $J = 8.0$  Hz, 1H).  $^{13}\text{C}$  NMR ( $\text{CDCl}_3$ , 125 MHz)  $\delta$  9.7, 32.4, 36.1, 48.5, 56.4, 109.2, 112.9, 119.2, 119.4, 121.7, 126.5, 127.2, 128.3, 128.7, 128.8, 129.8, 130.7, 132.5, 135.1, 139.0, 141.2. Anal. Calcd. for  $\text{C}_{25}\text{H}_{26}\text{N}_2$ : C, 84.70; H, 7.13, N, 7.40; found: C, 84.36; H, 7.13; N, 7.40.

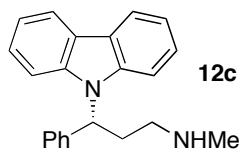

**(R)-3-(9H-Carbazol-9-yl)-N-methyl-3-phenylpropan-1-amine (12c)**: Prepared according to the general procedure from **5z** (0.113 g, 0.400 mmol) to give **12c** as an amorphous white solid in 73% yield (0.0913 g, 0.290 mmol). The enantiomeric excess after acylation with trifluoroacetic anhydride was determined by HPLC analysis (254 nm, 25  $^{\circ}\text{C}$ )  $t_{\text{R}}$  8.2 min (major);  $t_{\text{R}}$  9.0 min (minor) [Chiracel AD-H (0.46 cm x 25 cm)(from Daicel Chemical Ind., Ltd.) hexane/*i*-PrOH, 95:5, 1.0 mL/min] to be 98%.  $[\alpha]_{\text{D}}^{25} = +95.7^{\circ}$  (c 0.51,  $\text{CHCl}_3$ ).  $^1\text{H}$  NMR ( $\text{CDCl}_3$ , 500 MHz)  $\delta$  2.12 (br s, 1H), 2.29 (s, 3H), 2.35-2.66 (m, 2H), 2.70-2.76 (m, 1H), 2.80-2.87 (m, 1H), 6.14 (dd,  $J = 11.0, 4.5$  Hz, 1H), 7.24-7.39 (m, 11H), 8.15 (d,  $J = 8.0$  Hz, 2H).  $^{13}\text{C}$  NMR ( $\text{CDCl}_3$ , 125 MHz)  $\delta$  31.6, 36.4, 48.8, 55.0, 110.5, 119.2, 120.4, 123.4, 125.7, 126.8, 127.5, 128.8, 140.26, 140.33. Anal. Calcd. for  $\text{C}_{22}\text{H}_{22}\text{N}_2$ : C, 84.04; H, 7.05, N, 8.91; found: C, 83.71; H, 6.95; N, 8.80.

### Synthesis of ((1*S*,2*R*,3*R*)-1-(methylamino)-3-phenyl-2,3-dihydro-1*H*-pyrrolo[1,2-*a*]indol-2-yl)methanol (**13**)

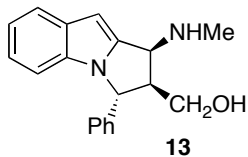

*N*-Allyl indole **5p** (0.100 g, 0.383 mmol, 99% ee), *N*-methylhydroxylamine hydrochloride (0.0959 g, 1.15 mmol), and sodium acetate (0.0973 g, 1.19 mmol) were combined in a 10 mL round bottom flask. THF (3.0 mL) was added to this mixture. The reaction mixture was heated at reflux. After 5 h the reaction mixture was cooled to room temperature and concentrated. The resulting residue was dissolved in  $\text{CHCl}_3$  and washed with water. The water layer was extracted with two additional portions of  $\text{CHCl}_3$ . The combined organic layer was washed with brine, and then dried over  $\text{MgSO}_4$ , filtered, and concentrated. Analysis of the crude reaction

mixture by  $^1\text{H}$  NMR spectroscopy showed a 90:10 regioisomeric ratio and the presence of the major regioisomer as a single diastereomer. The regioisomeric mixture was purified by flash column silica gel chromatography (60:40 hexanes:EtOAc) to give the major cycloadduct as a single isomer as an amorphous white solid in 83% yield (0.0924 g, 0.318 mmol). The enantiomeric excess was determined by HPLC analysis (254 nm, 25 °C)  $t_{\text{R}}$  12.9 min (minor);  $t_{\text{R}}$  17.0 min (major) [Chiracel AD-H (0.46 cm x 25 cm)(from Daicel Chemical Ind., Ltd.) hexane/*i*-PrOH, 95:5, 1.0 mL/min] to be 99%.  $[\alpha]_{\text{D}}^{25} = +193.6^\circ$  (c 0.59,  $\text{CHCl}_3$ ). Anal. Calcd. for  $\text{C}_{19}\text{H}_{18}\text{N}_2\text{O}$ : C, 78.59; H, 6.25, N, 9.65; found: C, 78.46; H, 6.34; N, 9.55. The purified cycloadduct (0.0400 g, 0.138 mmol) and zinc powder (0.132 g, 2.07 mmol) were combined in a 5 mL round bottom flask. AcOH (1.5 mL) and  $\text{H}_2\text{O}$  (0.5 mL) were added to the flask, and the reaction mixture was heated at 60 °C for 7 h. At this time, the reaction was cooled to room temperature and made basic by addition of concentrated  $\text{NH}_4\text{OH}$  (2.6 mL). The resulting mixture was extracted with  $\text{CHCl}_3$  (3x). The combined organic layers were dried over  $\text{MgSO}_4$ , filtered, and concentrated. The product was purified by flash column silica gel chromatography (70:30  $\text{CHCl}_3$ :*i*PrOH) to give ((1*S*,2*R*,3*R*)-1-(methylamino)-3-phenyl-2,3-dihydro-1*H*-pyrrolo[1,2-*a*]indol-2-yl)methanol **13** as an amorphous tan solid in 87% yield (0.0351 g, 0.120 mmol). The enantiomeric excess was determined by HPLC analysis (254 nm, 25 °C)  $t_{\text{R}}$  10.8 min (minor);  $t_{\text{R}}$  28.4 min (major) [Chiracel OD-H (0.46 cm x 25 cm)(from Daicel Chemical Ind., Ltd.) hexane/*i*-PrOH, 80:20, 1.0 mL/min] to be 99%.  $[\alpha]_{\text{D}}^{25} = +120.0^\circ$  (c 0.46,  $\text{CHCl}_3$ ).  $^1\text{H}$  NMR ( $\text{CDCl}_3$ , 500 MHz)  $\delta$  2.67 (s, 3H), 2.94 (dddd,  $J = 8.0, 7.0, 6.5, 4.0$ , 1H), 3.12 (br s, 2H), 3.90 (dd,  $J = 12.5, 6.0$  Hz, 1H), 4.09 (dd,  $J = 12.5, 4.0$  Hz, 1H), 4.41 (d,  $J = 7.0$  Hz, 1H), 5.41 (d,  $J = 8.0$  Hz, 1H), 6.45 (s, 1H), 6.65 (d,  $J = 8.0$  Hz, 1H), 6.97 (app t,  $J = 7.5$ , 1H), 7.07 (app t,  $J = 7.5$ , 1H), 7.20-7.22 (m, 2H), 7.35-7.39 (m, 3H), 7.64 (d,  $J = 7.5$  Hz, 1H).  $^{13}\text{C}$  NMR ( $\text{CDCl}_3$ , 125 MHz)  $\delta$  35.9, 58.3, 60.2, 60.7, 61.7, 93.7, 111.1, 119.9, 121.2, 121.3, 127.0, 128.4, 129.1, 132.5, 132.9, 139.6, 145.1. HRMS (ESI) calcd. for  $\text{C}_{19}\text{H}_{21}\text{N}_2\text{O}^+$   $[\text{M}+\text{H}]^+$  293.1654, found 293.1660.

### Synthesis of (*R*)-3-(3-(methoxycarbonyl)-1*H*-indol-1-yl)-3-phenylpropanoic acid (**14**)

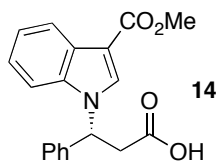

(*R*)-Methyl 1-(3-hydroxy-1-phenylpropyl)-1*H*-indole-3-carboxylate **10** (0.150 g, 0.485 mmol), iodobenzene diacetate (0.344g, 1.07 mmol), TEMPO (0.0152 g, 0.0970 mmol), and sodium bicarbonate (0.0815 g, 0.970 mmol) were combined in a 1-dram vial. Acetonitrile (1 mL) and  $\text{H}_2\text{O}$  (1 mL) were added to the vial. The vial was sealed with a PTFE/silicone-lined septum cap, and the reaction was stirred at room temperature for 1 h. The reaction mixture was poured into 1 M HCl (10 mL) and extracted with  $\text{CH}_2\text{Cl}_2$  (2 x 20 mL). The combined organic layers were concentrated. The crude product was purified by flash column silica gel chromatography (40:60 hexanes:EtOAc) to give (*R*)-3-(3-(methoxycarbonyl)-1*H*-indol-1-yl)-3-phenylpropanoic acid **14** as a pale yellow solid in 81% yield (0.126 g, 0.391 mmol). The enantiomeric excess was determined by HPLC analysis (254 nm, 25 °C)  $t_{\text{R}}$  15.7 min (minor);  $t_{\text{R}}$  21.9 min (major) [Chiracel AD-H (0.46 cm x 25 cm)(from Daicel Chemical Ind., Ltd.) hexane/*i*-PrOH, 90:10, 1.0 mL/min] to be 97%.  $[\alpha]_{\text{D}}^{26} = +4.6^\circ$  (c 0.56,  $\text{CHCl}_3$ ).  $^1\text{H}$  NMR ( $\text{CDCl}_3$ , 500 MHz)  $\delta$  3.34 (dd,  $J = 17.0, 7.0$  Hz, 1H), 3.41 (dd,  $J = 17.0, 8.0$  Hz, 1H), 3.91 (s, 3H), 6.08 (dd,  $J = 8.0, 7.0$  Hz, 1H), 7.20-7.34 (m, 7H), 7.38 (d,  $J = 7.5$  Hz, 1H), 8.03 (s, 1H), 8.17 (dd,  $J = 8.0, 1.5$  Hz, 1H).  $^{13}\text{C}$  NMR ( $\text{CDCl}_3$ , 125 MHz)  $\delta$  39.9, 51.3, 56.5, 108.2, 110.7, 121.9, 122.4, 123.2, 126.4, 126.8, 128.7, 129.3, 131.9, 136.7, 138.4, 165.9, 174.4. HRMS (ESI) calcd. for  $\text{C}_{19}\text{H}_{18}\text{NO}_4^+$   $[\text{M}+\text{H}]^+$  324.1236, found 324.1241.

## References

- (1) J. Waser, B. Gaspar, H. Nambu, E. M. Carreira, *J. Am. Chem. Soc.* **2006**, *128*, 11693-11712.
- (2) J. G. Rodríguez, A. Lafuente, P. García-Almaraz, *J. Heterocyclic Chem.* **2000**, *37*, 1281-1288.
- (3) M. Takemoto, Y. Iwakiri, and K. Tanaka, *Heterocycles* **2007**, *72*, 373-383.
- (4) R. Walter, S. Kirchner, R. Franz, *U.S. Patent* 6,399,804, **2002**.
- (5) a) D. Polet, A. Alexakis, *Org. Lett.* **2005**, *7*, 1621; b) D. Polet, A. Alexakis, K. Tissot-Croset, C. Corminboeuf, K. Ditrich, *Chem. Eur. J.* **2006**, *12*, 3596.
- (6) D. Markovic, J. F. Hartwig, *J. Am. Chem. Soc.* **2007**, *129*, 11680.
- (7) L. M. Stanley, J. F. Hartwig, *J. Am. Chem. Soc.* **2009**, *131*, 8971.
- (8) D. J. Weix, M. Ueda, J. F. Hartwig, *Org. Lett.* **2009**, *11*, 2944.
- (9) M. A. Blanchette, W. Choy, J. T. Davis, A. P. Essinfeld, S. Masamune, W. R. Roush, T. Sakai, *Tetrahedron Lett.* **1984**, *25*, 2183.
- (10) R. Greenhouse, S. Jaime-Figueroa, L. Raptova, D. C. Reuter, K. A. Stein, R. J. Weikert, 3-Amino-1-arylpropyl Indoles as Monoamine Reuptake Inhibitors. Int. Pat. Appl. WO 2005/118539 A1, Dec 15, 2005.
- (11) P. E. Mahaney, A. T. Vu, C. C. McComas, P. Zhang, L. M. Nogle, W. L. Watts, A. Sarkahian, L. Leventhal, N. R. Sullivan, A. J. Uveges, E. J. Trybulski, *Bioorg. Med. Chem.* **2006**, *14*, 8455.

LS-II-110-1H-VXR500-1

expl s2pul

| SAMPLE              |                | DEC. & VT  |          |
|---------------------|----------------|------------|----------|
| date                | Jul 28 2009    | dfrq       | 499.432  |
| solvent             | CDC13          | dn         | H1       |
| file                | /export/home/~ | dpwr       | 25       |
| data/vxr500/Hartwi- |                | dof        | 0        |
| g/stanley1/LS-II-1- |                | dm         | nnn      |
| 10-1H-VXR500-1.fid  |                | dmm        | c        |
| ACQUISITION         |                | dmf        | 200      |
| sfrq                | 499.432        | dseq       |          |
| tn                  | H1             | dres       | 1.0      |
| at                  | 4.096          | homo       | n        |
| np                  | 65536          | PROCESSING |          |
| sw                  | 8000.0         | lb         | 0.30     |
| fb                  | 4000           | wtfile     |          |
| bs                  | 4              | proc       | ft       |
| tpwr                | 62             | fn         | not used |
| pw                  | 4.5            | math       | f        |
| d1                  | 8.000          |            |          |
| tof                 | 0              | werr       |          |
| nt                  | 8              | wexp       |          |
| ct                  | 8              | wbs        | wft      |
| alock               | n              | wnt        |          |
| gain                | not used       |            |          |
| FLAGS               |                |            |          |
| il                  | n              |            |          |
| in                  | n              |            |          |
| dp                  | y              |            |          |
| hs                  | nn             |            |          |
| DISPLAY             |                |            |          |
| sp                  | -1502.5        |            |          |
| wp                  | 7999.8         |            |          |
| vs                  | 80             |            |          |
| sc                  | 0              |            |          |
| wc                  | 250            |            |          |
| hzmm                | 32.00          |            |          |
| is                  | 33.57          |            |          |
| rfl                 | 1502.7         |            |          |
| rfp                 | 0              |            |          |
| th                  | 7              |            |          |
| ins                 | 1.000          |            |          |
| nm                  | ph             |            |          |

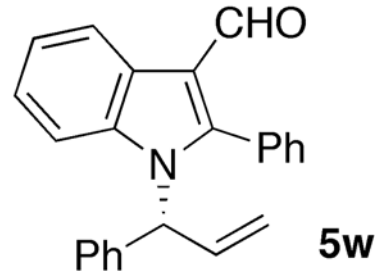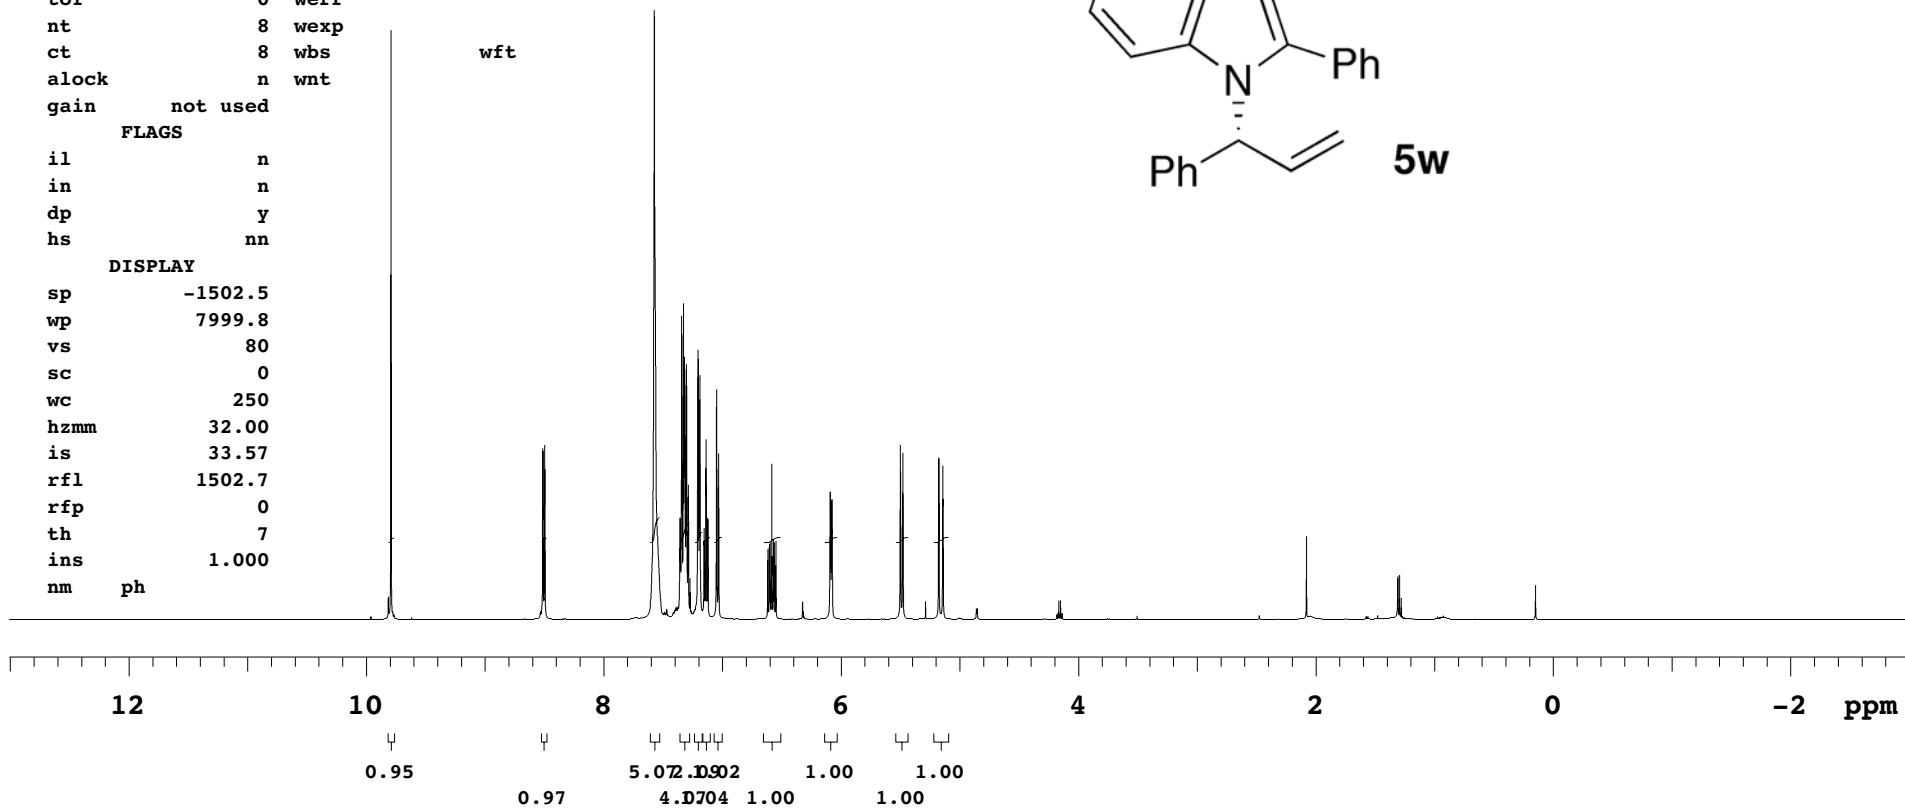

expl s2pul

SAMPLE DEC. & VT  
 date Jul 23 2009 dfrq 499.432  
 solvent CDCl3 dn H1  
 file /export/home/~ dpwr 44  
 data/vxr500/Hartwi- dof -827.0  
 g/stanley1/LS-IV-1- dm YYY  
 24-13C-VXR500-2.fi- dmm w  
 d dmf 20202

ACQUISITION dseq  
 sfrq 125.596 dres 1.0  
 tn C13 homo n  
 at 1.024 PROCESSING  
 np 65536 lb 1.00  
 sw 32000.0 wtfile  
 fb 18000 proc ft  
 bs 16 fn not used  
 ss 1 math f  
 tpwr 63  
 pw 5.2 werr  
 dl 1.000 wexp  
 tof 1880.0 wbs wft  
 nt 512 wnt  
 ct 101

alock n  
 gain not used  
 FLAGS  
 il n  
 in n  
 dp y  
 hs nn

DISPLAY  
 sp -2200.7  
 wp 31999.0  
 vs 100  
 sc 0  
 wc 250  
 hzmm 128.00  
 is 500.00  
 rfl 11900.4  
 rfp 9698.7  
 th 9  
 ins 100.000  
 nm ph

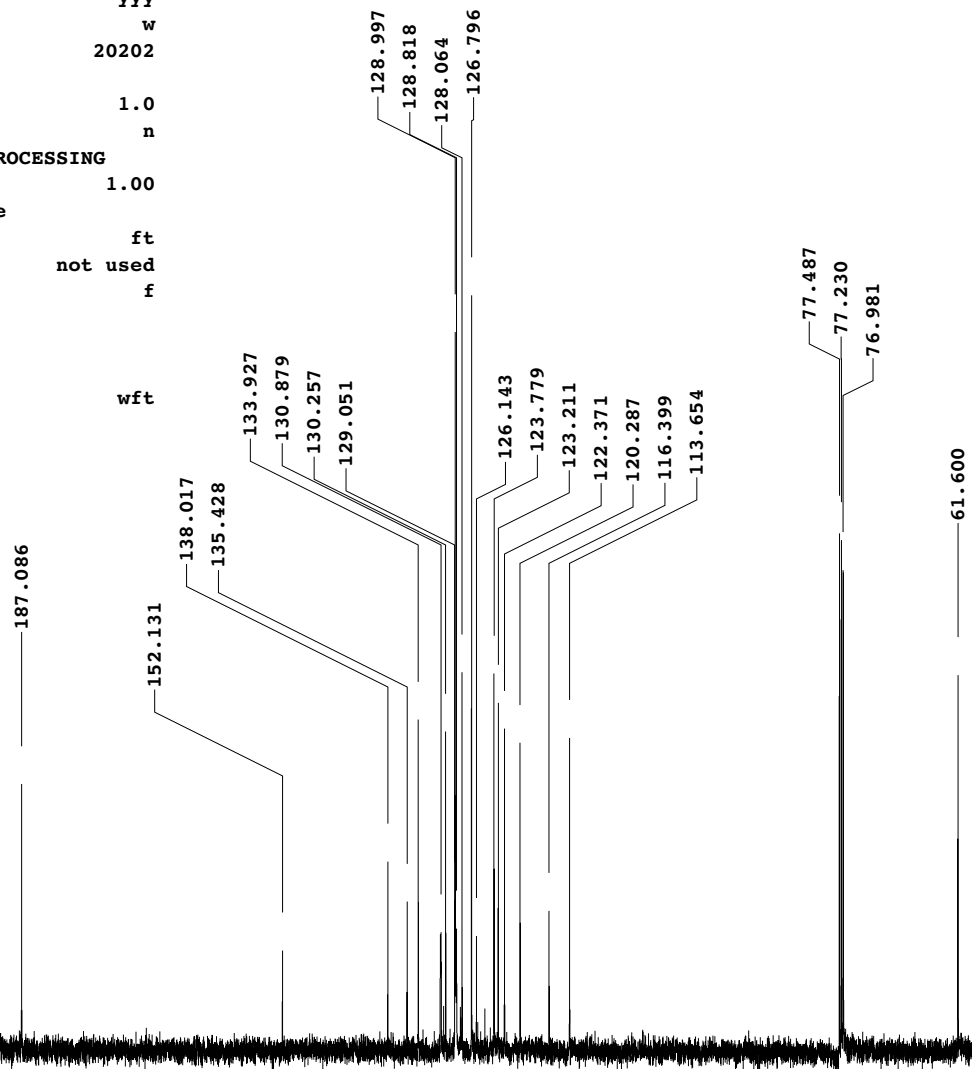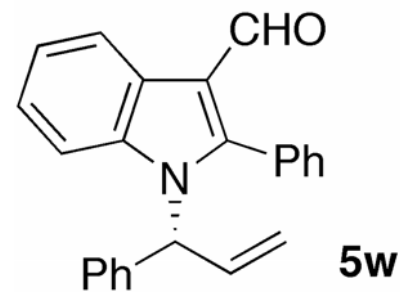

220 200 180 160 140 120 100 80 60 40 20 0 ppm

LS-IV-75-1H-VXR500

exp1 s2pul

| SAMPLE              |                | DEC. & VT  |          |
|---------------------|----------------|------------|----------|
| date                | Jun 29 2009    | dfrq       | 499.432  |
| solvent             | CDC13          | dn         | H1       |
| file                | /export/home/~ | dpwr       | 25       |
| data/vxr500/Hartwi- |                | dof        | 0        |
| g/stanley1/LS-IV-7- |                | dm         | nnn      |
| 5-1H-VXR500.fid     |                | dmm        | c        |
| ACQUISITION         |                | dmf        | 200      |
| sfrq                | 499.432        | dseq       |          |
| tn                  | H1             | dres       | 1.0      |
| at                  | 4.096          | homo       | n        |
| np                  | 65536          | PROCESSING |          |
| sw                  | 8000.0         | lb         | 0.30     |
| fb                  | 4000           | wtfile     |          |
| bs                  | 4              | proc       | ft       |
| tpwr                | 62             | fn         | not used |
| pw                  | 4.5            | math       | f        |
| d1                  | 8.000          |            |          |
| tof                 | 0              | werr       |          |
| nt                  | 8              | wexp       |          |
| ct                  | 8              | wbs        | wft      |
| alock               | n              | wnt        |          |
| gain                | not used       |            |          |
| FLAGS               |                |            |          |
| il                  | n              |            |          |
| in                  | n              |            |          |
| dp                  | y              |            |          |
| hs                  | nn             |            |          |
| DISPLAY             |                |            |          |
| sp                  | -1502.5        |            |          |
| wp                  | 7999.8         |            |          |
| vs                  | 151            |            |          |
| sc                  | 0              |            |          |
| wc                  | 250            |            |          |
| hzmm                | 32.00          |            |          |
| is                  | 277.42         |            |          |
| rfl                 | 1502.7         |            |          |
| rfp                 | 0              |            |          |
| th                  | 7              |            |          |
| ins                 | 1.000          |            |          |
| nm                  | ph             |            |          |

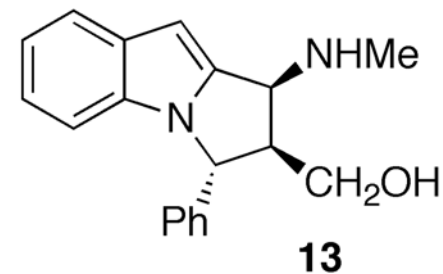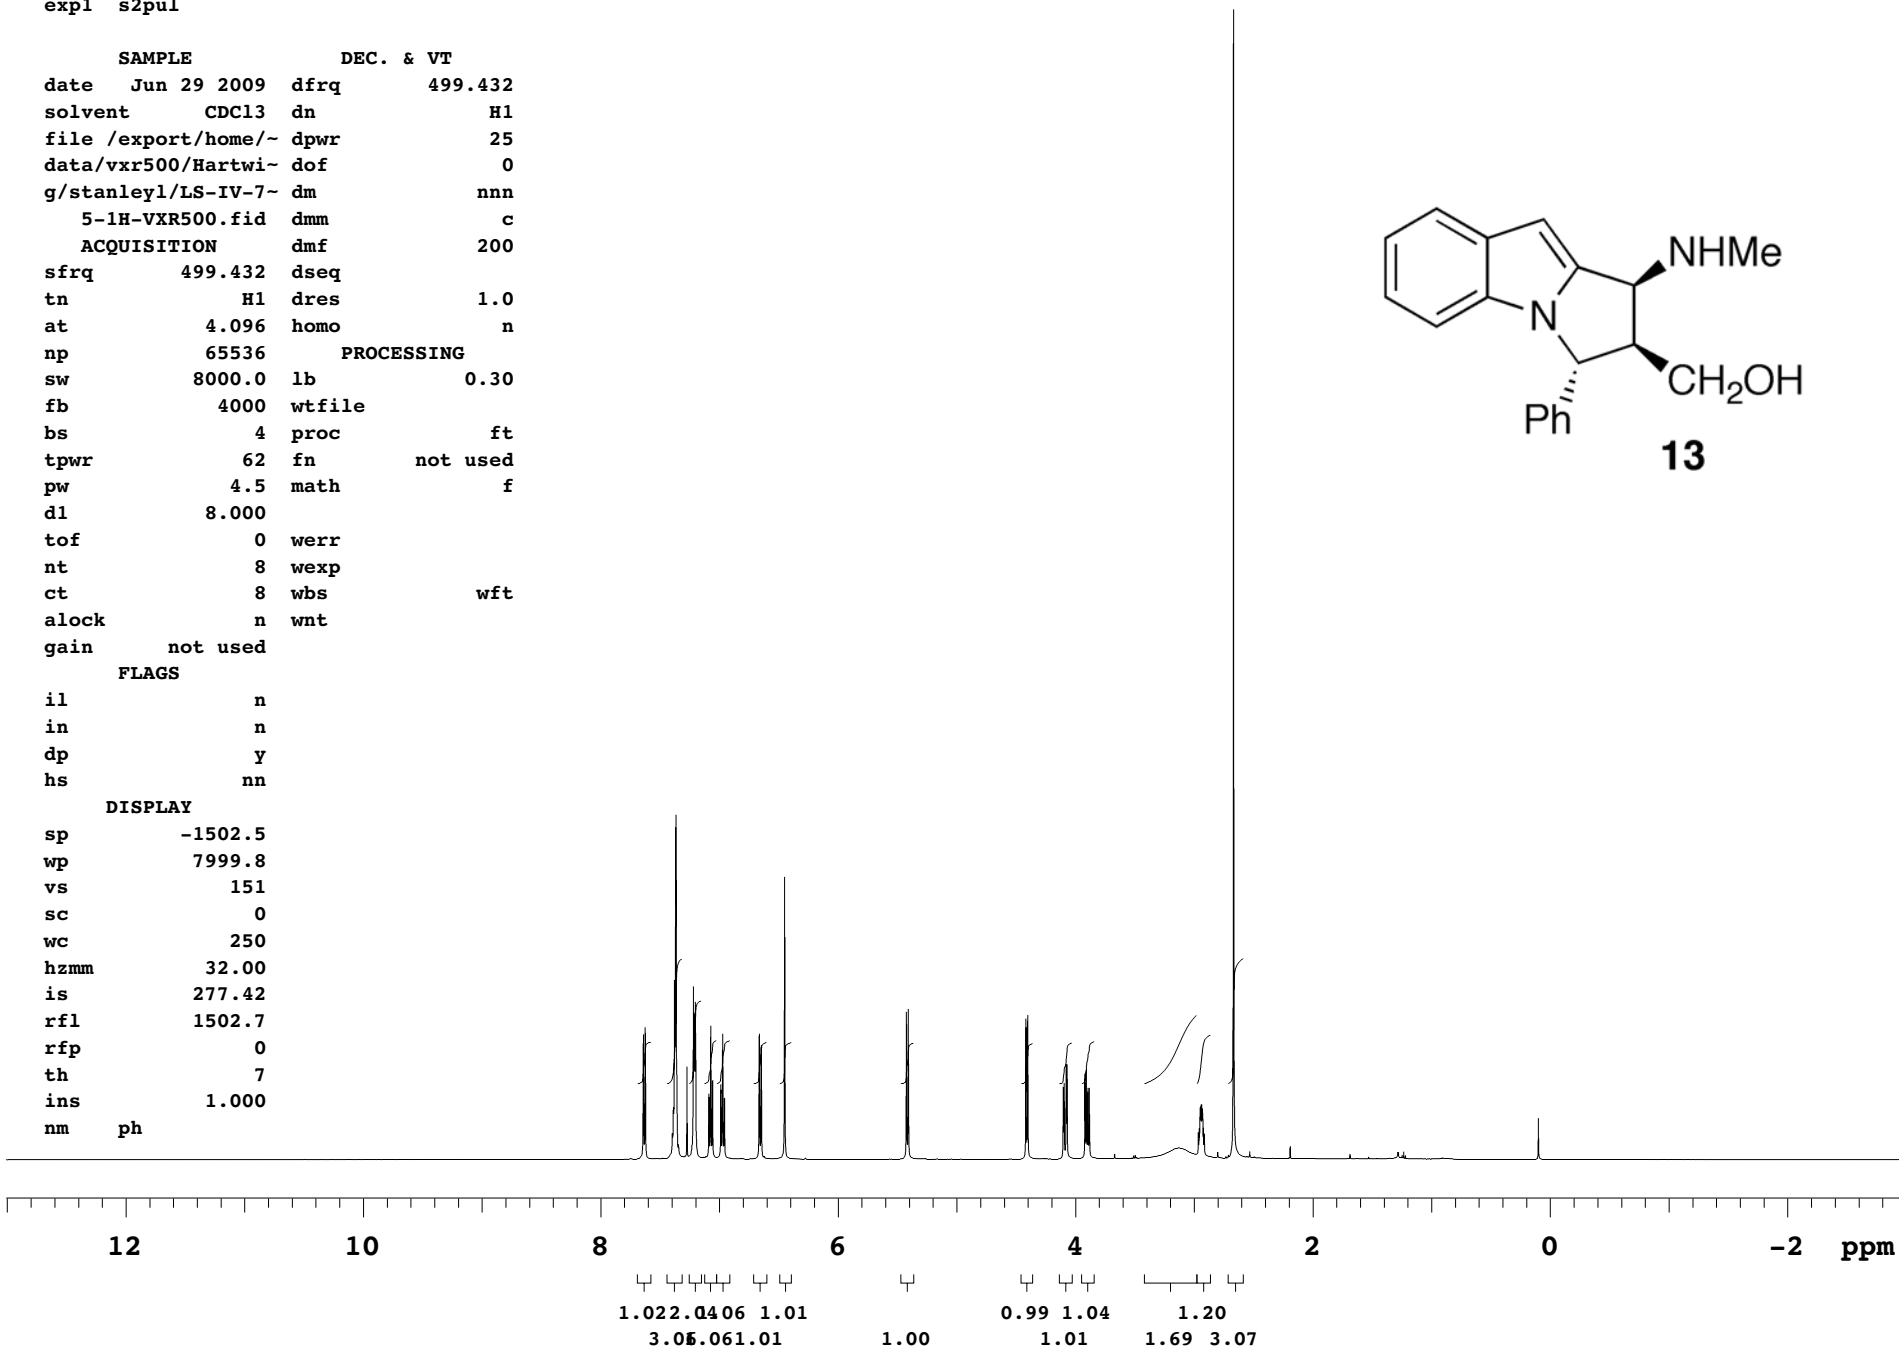

LS-IV-75-13C-VXR500

expl s2pul

| SAMPLE              |                | DEC. & VT  |          |
|---------------------|----------------|------------|----------|
| date                | Jun 29 2009    | dfrq       | 499.432  |
| solvent             | CDC13          | dn         | H1       |
| file                | /export/home/~ | dpwr       | 44       |
| data/vxr500/Hartwi- |                | dof        | -827.0   |
| g/stanley1/LS-IV-7- |                | dm         | YYY      |
| 5-13C-VXR500.fid    |                | dmm        | w        |
| ACQUISITION         |                | dmf        | 20202    |
| sfrq                | 125.596        | dseq       |          |
| tn                  | C13            | dres       | 1.0      |
| at                  | 1.024          | homo       | n        |
| np                  | 65536          | PROCESSING |          |
| sw                  | 32000.0        | lb         | 1.00     |
| fb                  | 18000          | wtfile     |          |
| bs                  | 16             | proc       | ft       |
| ss                  | 1              | fn         | not used |
| tpwr                | 63             | math       | f        |
| pw                  | 5.2            |            |          |
| d1                  | 1.000          | werr       |          |
| tof                 | 1880.0         | wexp       |          |
| nt                  | 512            | wbs        | wft      |
| ct                  | 168            | wnt        |          |
| alock               | n              |            |          |
| gain                | not used       |            |          |
| FLAGS               |                |            |          |
| il                  | n              |            |          |
| in                  | n              |            |          |
| dp                  | y              |            |          |
| hs                  | nn             |            |          |
| DISPLAY             |                |            |          |
| sp                  | -2194.9        |            |          |
| wp                  | 31999.0        |            |          |
| vs                  | 120            |            |          |
| sc                  | 0              |            |          |
| wc                  | 250            |            |          |
| hzmm                | 128.00         |            |          |
| is                  | 500.00         |            |          |
| rfl                 | 11894.5        |            |          |
| rfp                 | 9698.7         |            |          |
| th                  | 9              |            |          |
| ins                 | 100.000        |            |          |
| nm                  | ph             |            |          |

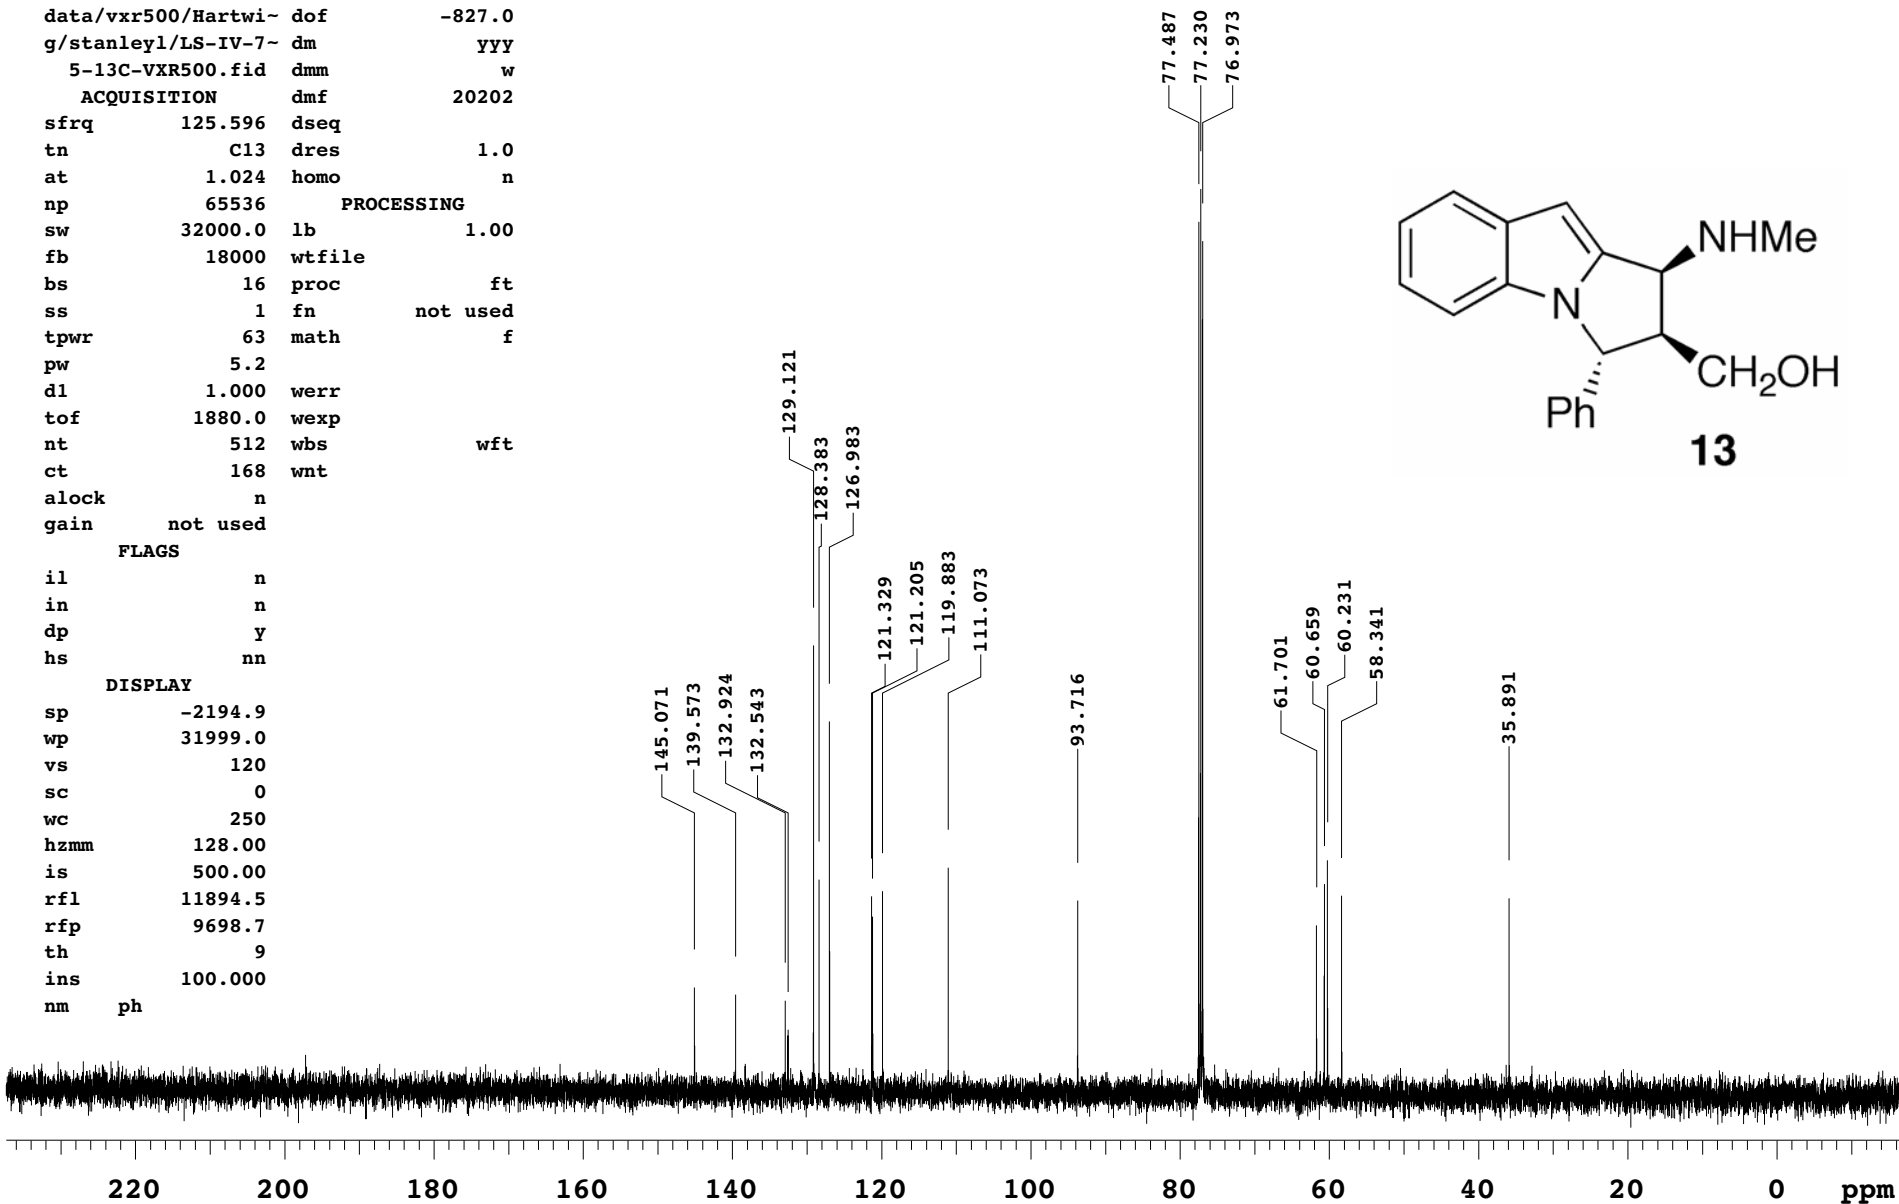

LS-IV-192-1H-VXR500-1

expl s2pul

```
SAMPLE          DEC. & VT
date Jul 28 2009 dfrq      499.432
solvent  CDCl3  dn         H1
file /export/home/~ dpwr    25
data/vxr500/Hartwi~ dof     0
g/stanley1/LS-IV-1~ dm      nnn
92-1H-VXR500-1.fid dmm      c
ACQUISITION    dmf        200
sfrq      499.432 dseq
tn         H1  dres        1.0
at         4.096 homo      n
np         65536          PROCESSING
sw         8000.0 lb       0.30
fb         4000  wtfile
bs         4    proc      ft
tpwr      62    fn        not used
pw         4.5  math      f
d1         8.000
tof        0    werr
nt         8    wexp
ct         8    wbs      wft
alock      n    wnt
gain      not used
FLAGS
il         n
in         n
dp         y
hs         nn
DISPLAY
sp         -1502.5
wp         7999.8
vs         151
sc         0
wc         250
hzmm      32.00
is         33.57
rfl       1502.7
rfp        0
th         7
ins       1.000
nm        ph
```

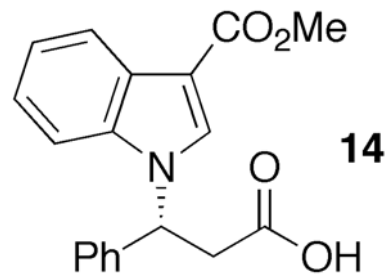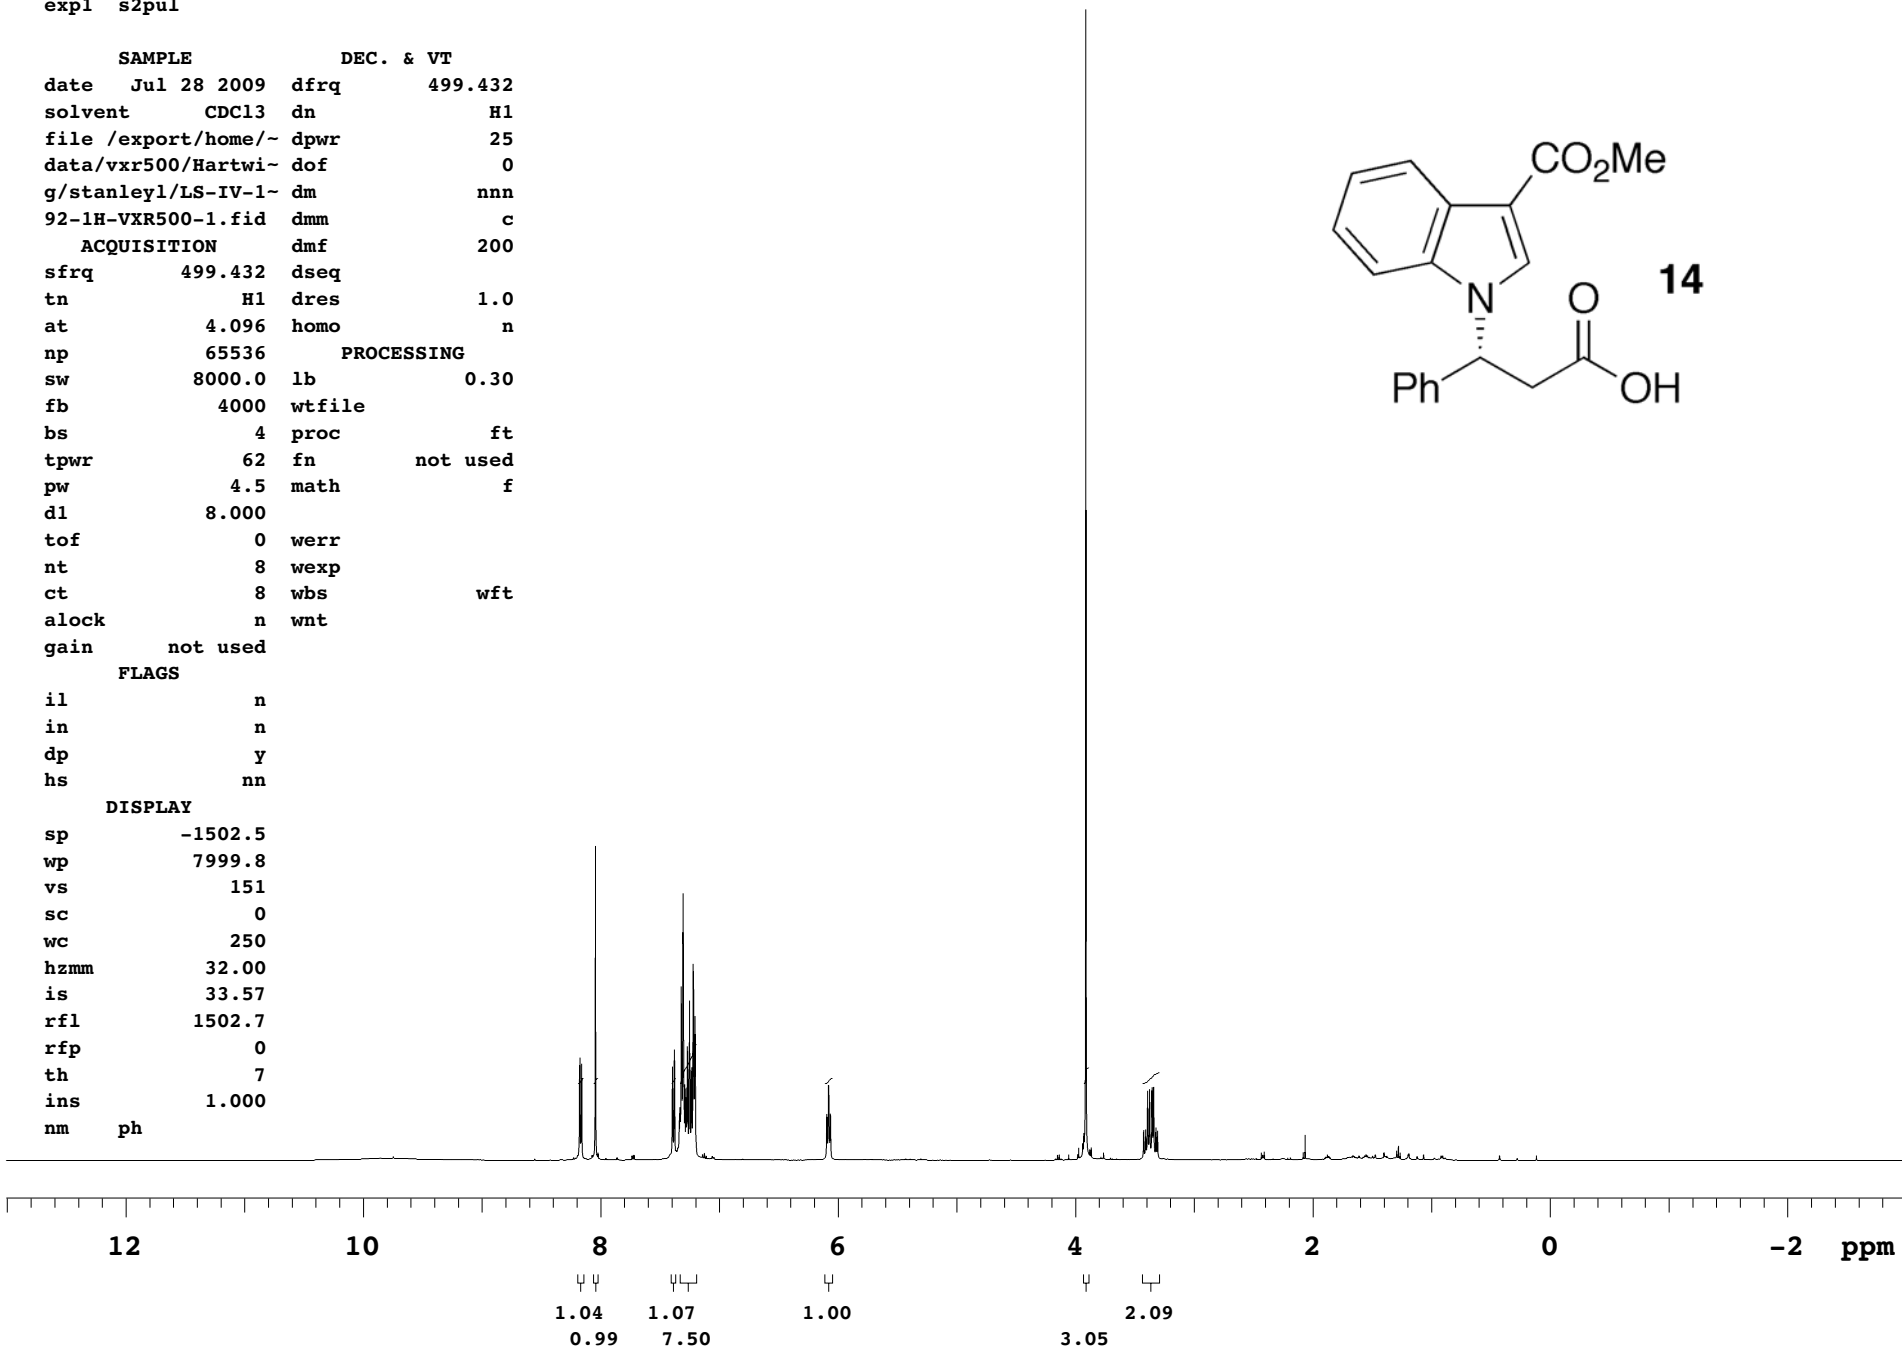



LS-IV-192-13C-VXR500

expl s2pul

| SAMPLE              |                | DEC. & VT  |          |
|---------------------|----------------|------------|----------|
| date                | Jul 16 2009    | dfrq       | 499.432  |
| solvent             | CDC13          | dn         | H1       |
| file                | /export/home/~ | dpwr       | 44       |
| data/vxr500/Hartwi- |                | dof        | -827.0   |
| g/stanley1/LS-IV-1- |                | dm         | YYY      |
| 92-13C-VXR500.fid   |                | dmm        | w        |
| ACQUISITION         |                | dmf        | 20202    |
| sfrq                | 125.596        | dseq       |          |
| tn                  | C13            | dres       | 1.0      |
| at                  | 1.024          | homo       | n        |
| np                  | 65536          | PROCESSING |          |
| sw                  | 32000.0        | lb         | 1.00     |
| fb                  | 18000          | wtfile     |          |
| bs                  | 16             | proc       | ft       |
| ss                  | 1              | fn         | not used |
| tpwr                | 63             | math       | f        |
| pw                  | 5.2            |            |          |
| d1                  | 1.000          | werr       |          |
| tof                 | 1880.0         | wexp       |          |
| nt                  | 512            | wbs        | wft      |
| ct                  | 162            | wnt        |          |
| alock               | n              |            |          |
| gain                | not used       |            |          |
| FLAGS               |                |            |          |
| il                  | n              |            |          |
| in                  | n              |            |          |
| dp                  | y              |            |          |
| hs                  | nn             |            |          |
| DISPLAY             |                |            |          |
| sp                  | -2206.6        |            |          |
| wp                  | 31999.0        |            |          |
| vs                  | 162            |            |          |
| sc                  | 0              |            |          |
| wc                  | 250            |            |          |
| hzmm                | 128.00         |            |          |
| is                  | 500.00         |            |          |
| rfl                 | 11906.3        |            |          |
| rfp                 | 9698.7         |            |          |
| th                  | 6              |            |          |
| ins                 | 100.000        |            |          |
| nm                  | ph             |            |          |

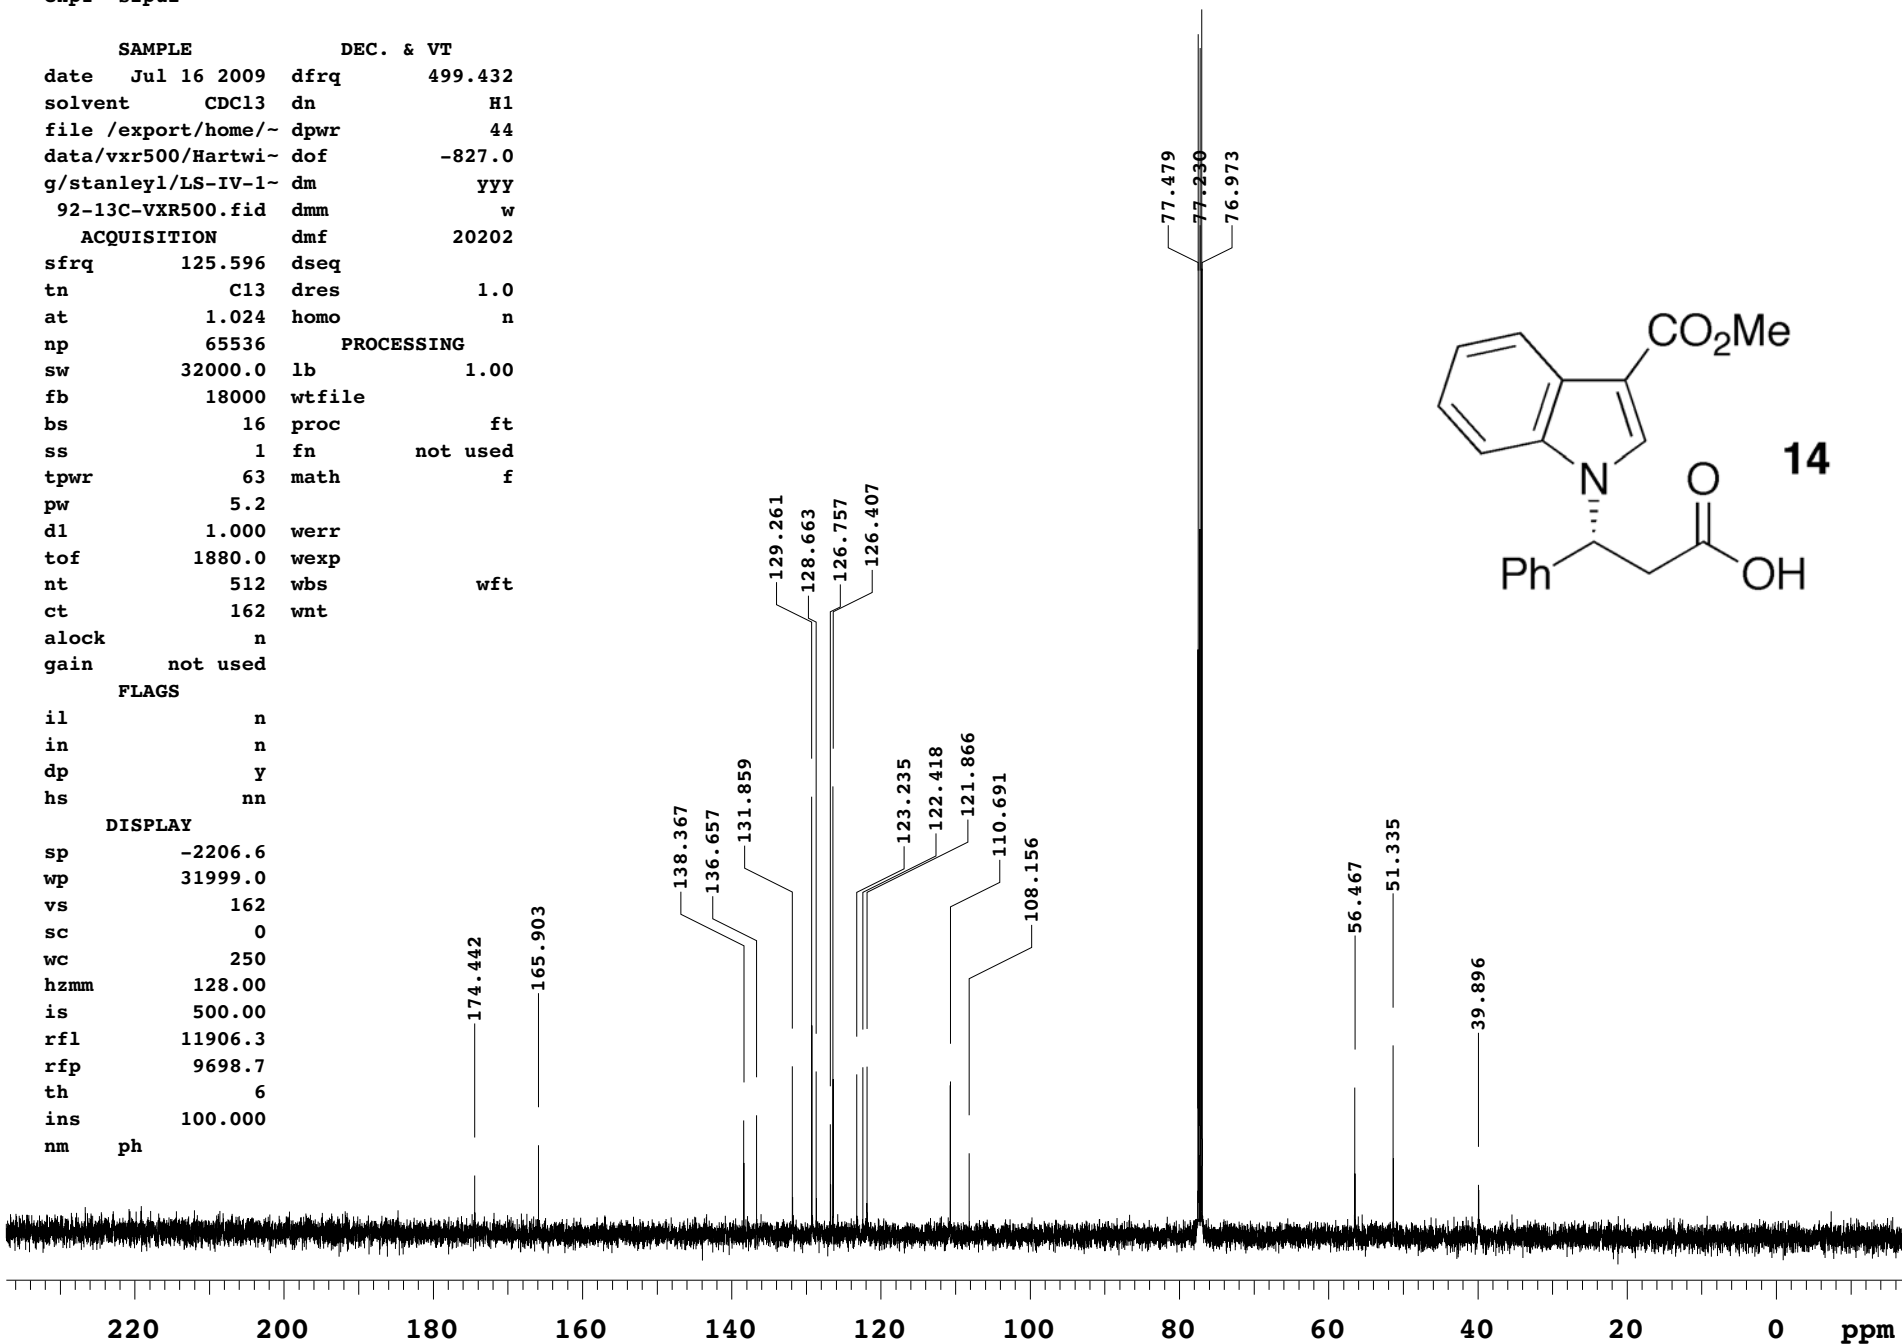

Supplement: NIHMS173108-supplement-S_I_.pdf [file NIHMS173108-supplement-S_I_.pdf]
